# Supplementary material
Source: MDPI journal article supplement (https://www.mdpi.com/2077-0472/11/11/1098)
Supplement: s1 [file s1]

## *Agriculture*

Semi-automated ground truth segmentation and phenotyping of plant structures using k-means clustering of Eigen-colors (kmSeg)

M. Henke, K. Neumann, T. Altmann, E. Gladilin

### **Supplementary Information**

# Algorithm S1. Performance test of clustering methods on synthetic data.

```
% begin of the MATLAB code

% clean workspace
clear all; close all;

% loop over 100 iteration:
% by each iteration generate a bi-Gaussian distribution with a increasing number of points: 400, 800,... 40000for i=1:100

% define the number of points in each cluster starting with 200 (in both clusters - 400)
N=i*200;

% set random generator to default for better reproducibility
rng('default');

% generate a 2D bi-Gaussian (i.e. two-cluster) distribution of points

% first cluster
pd1x = makedist('Normal','mu',-2,'sigma',1); X1 = random(pd1x,N,1);
pd1y = makedist('Normal','mu',-2,'sigma',1); Y1 = random(pd1y,N,1);

% second cluster
pd2x = makedist('Normal','mu',2,'sigma',1); X2 = random(pd2x,N,1);
pd2y = makedist('Normal','mu',2,'sigma',1); Y2 = random(pd2y,N,1);

% merge both distributions together for subsequent clustering
X=[X1;X2];
Y=[Y1;Y2];
data=[];
data(:,1) = X(:);
data(:,2) = Y(:);

% total number of points in the cumulative distribution
L=size(data,1);

%%%%%%%%%%%% perform k-means clustering

% start timer
tic

% perform k-means clustering of data
[idx] = kmeans(data,2);

% stop timer
t1 = toc;

% save the number of points and calculation time for visualization of results
performance1(i,1) = L;
performance1(i,2) = t1;

%%%%%%%%%%%% perform spectral clustering

% start timer
tic

% perform spectral clustering of data
[idx] = spectralcluster(data,2);

% stop timer
t2 = toc;

% save the number of points and calculation time for visualization of results
performance2(i,1) = L;
performance2(i,2) = t2;
```

```
% perform hierarchical clustering
```

```
% start timer
```

```
tic
```

```
% perform hierarchical clustering of data
```

```
[idx] = clusterdata(data,2);
```

```
% stop timer
```

```
t3 = toc;
```

```
% save the number of points and calculation time for visualization of results
```

```
performance3(i,1) = L;
```

```
performance3(i,2) = t3;
```

```
% print output for every iteration
```

```
fprintf('i=%d\tL=%d\tkm=%3f s.\tsc=%3f s.\thc=%3f s.\n',i,L,t1,t2,t3);
```

```
end % end of the for-loop
```

```
% plot calculation time of k-means, spectral and hierarchical clustering as a function of the number of points
```

```
figuresubplot(1,2,1)
```

```
plot(X,Y,'b.')
xlabel('X');
```

```
ylabel('Y');
```

```
subplot(1,2,2)
```

```
plot(performance1(:,1),performance1(:,2),'b-','LineWidth',2)
```

```
hold on
```

```
plot(performance2(:,1),performance2(:,2),'g-','LineWidth',2)
```

```
hold on
```

```
plot(performance3(:,1),performance3(:,2),'r-','LineWidth',2)
```

```
hold off
```

```
xlabel('Number of points')
```

```
ylabel('Calculation time, sec.')
```

```
legend('k-means','spectral','hierarchical','Location','northwest')
```

```
% end of the MATLAB code
```

Figure S1. Example of arabidopsis image segmentation (VIS, side view).

Original image

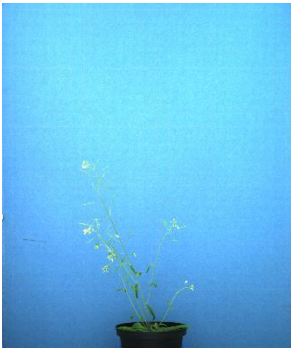

All 25 k-means color classes

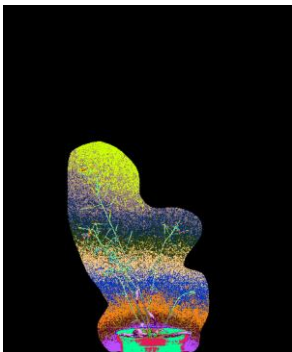

Binary image & convex hull

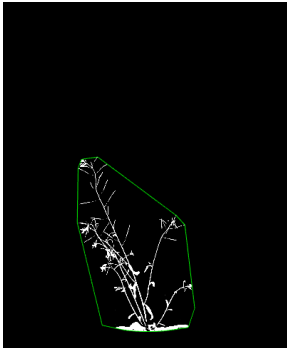

ROI after „clean outside“

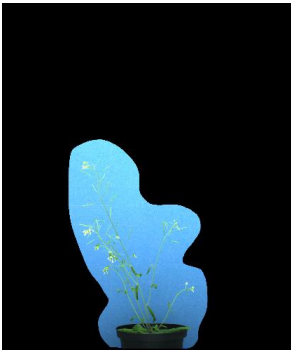

11 selected plant color classes

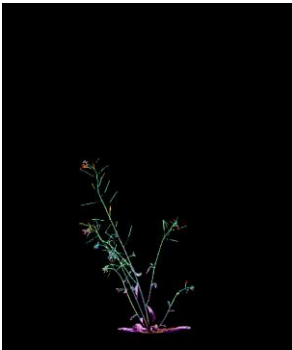

Segmented image

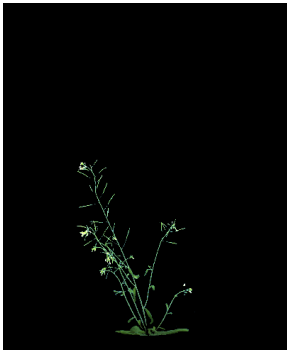

Overview of all and selected plant k-means color classes

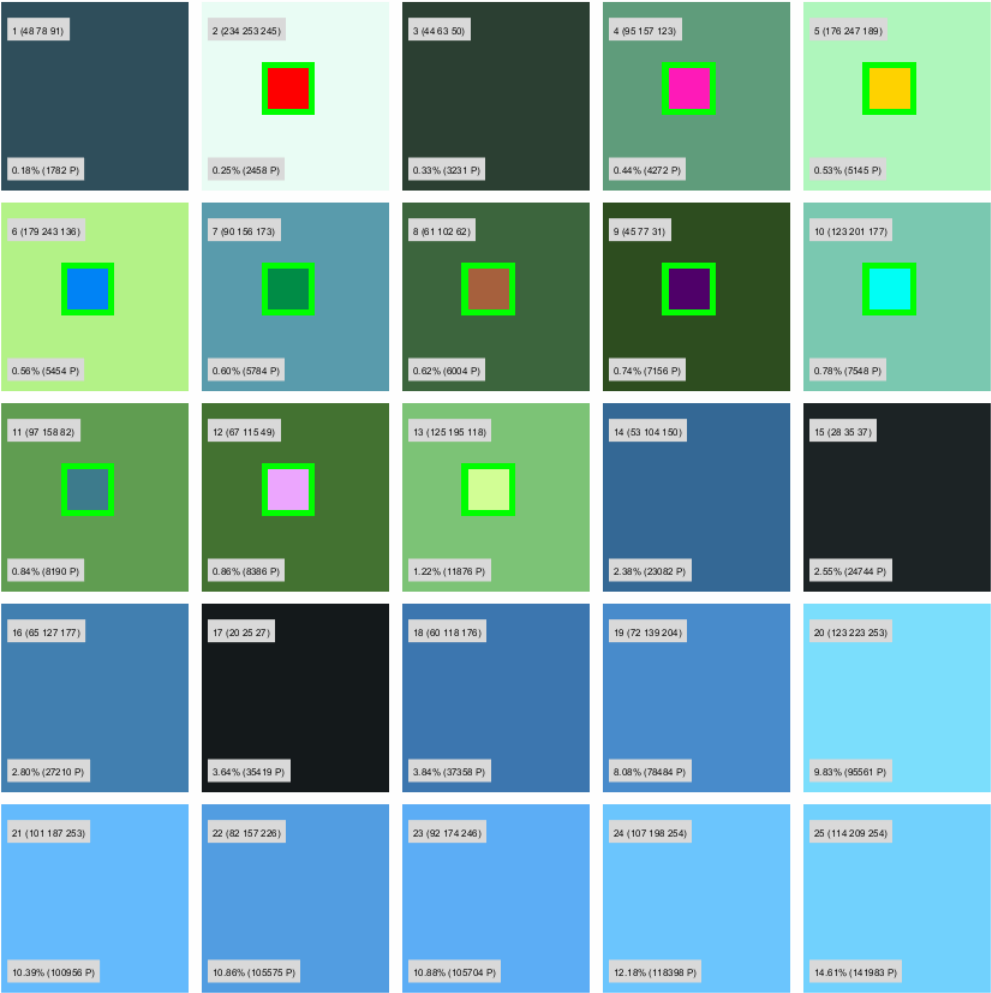

Figure S2. Example of arabidopsis image segmentation (VIS, top view).

Original image

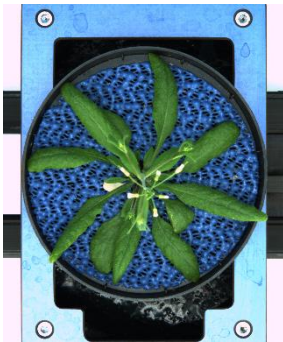

All 25 k-means color classes

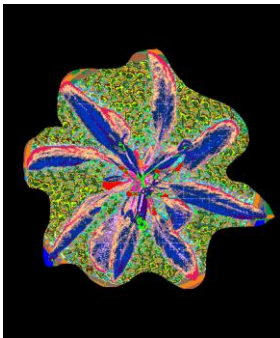

Binary image & convex hull

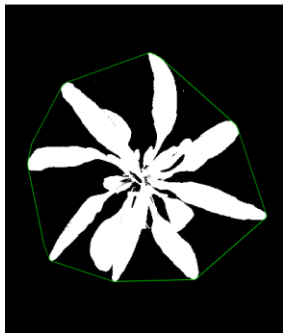

ROI after „clean outside“

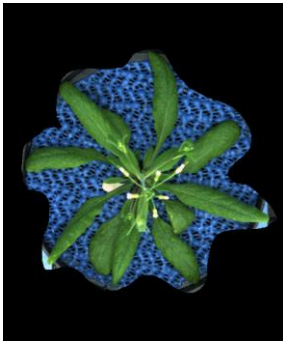

9 selected plant color classes

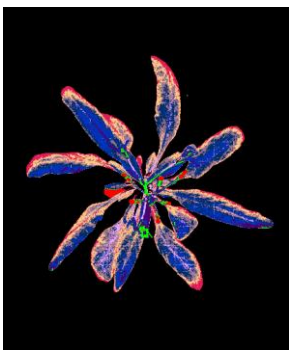

Segmented image

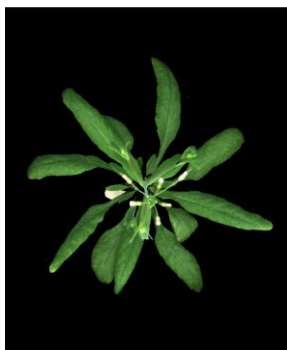

Overview of all and selected plant k-means color classes

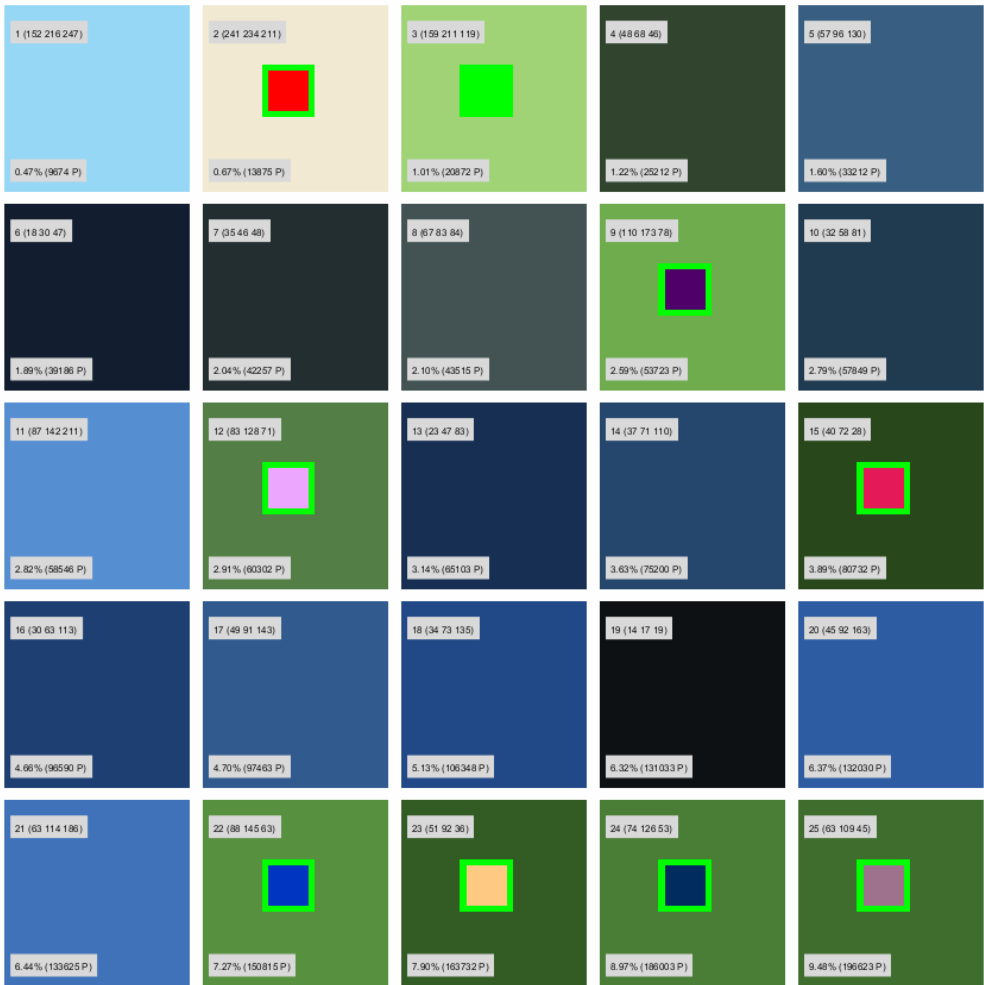

**Figure S3. Example of arabidopsis image segmentation (FLUO, side view).**

Original image

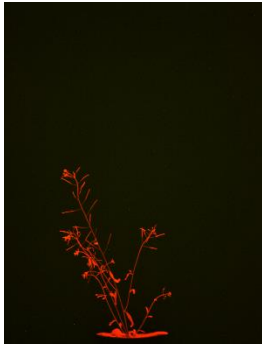

All 25 k-means color classes

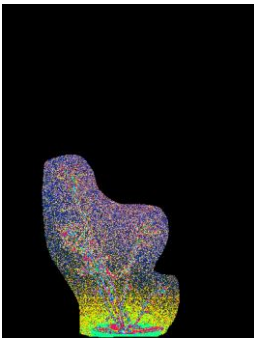

Binary image & convex hull

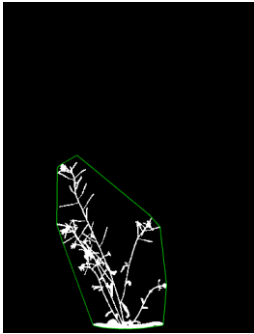

ROI after „clean outside“

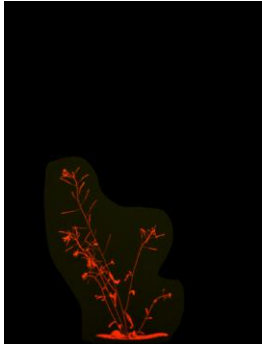

12 selected plant color classes

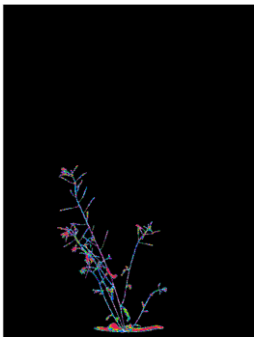

Segmented image

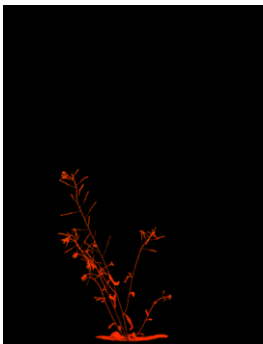

Overview of all and selected plant k-means color classes

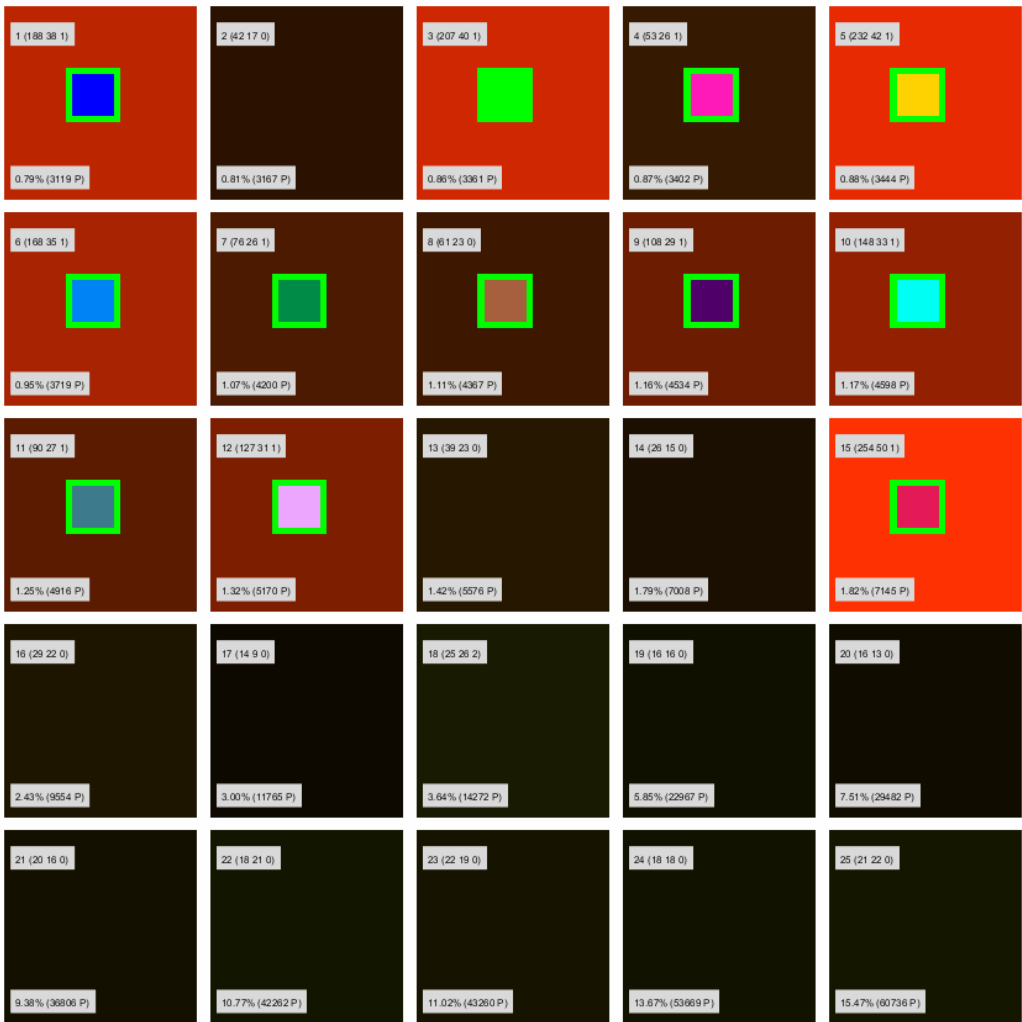

Figure S4. Example of arabidopsis image segmentation (FLUO, top view).

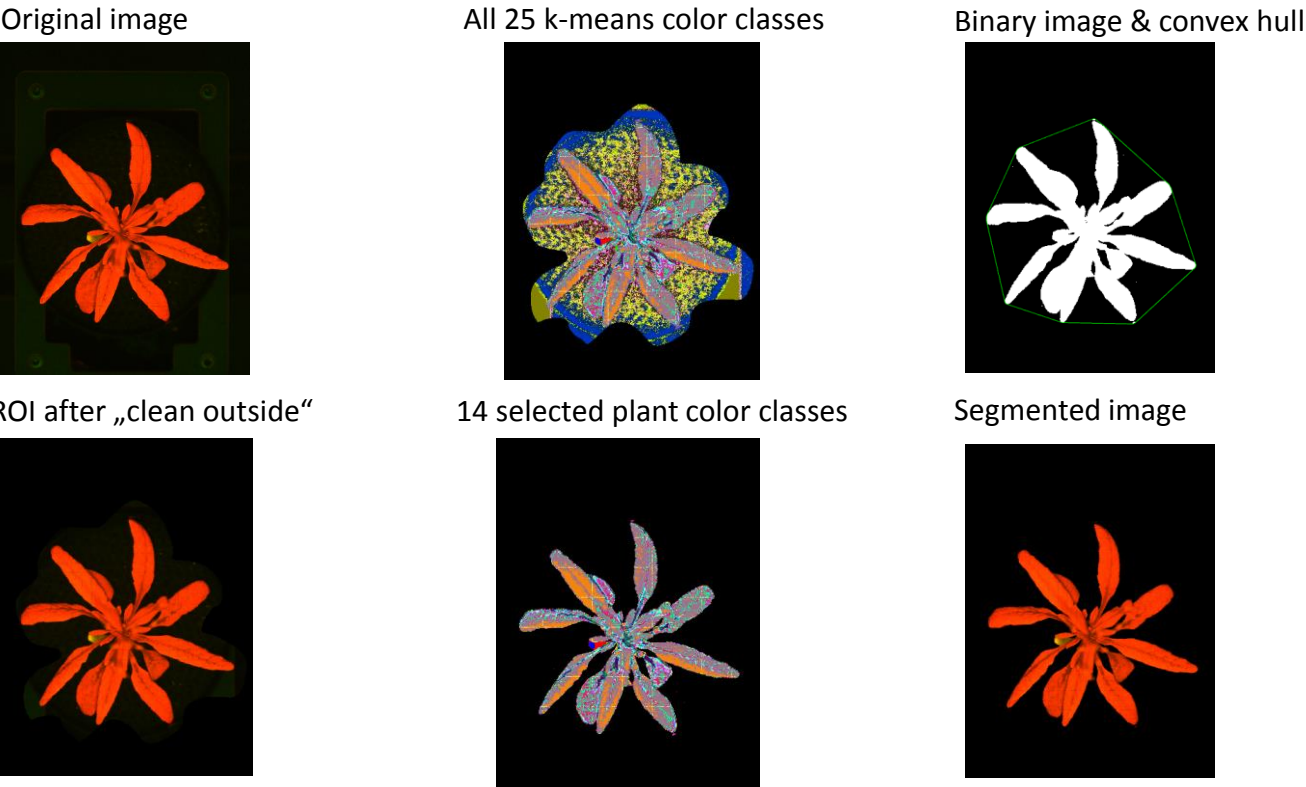

Overview of all and selected plant k-means color classes

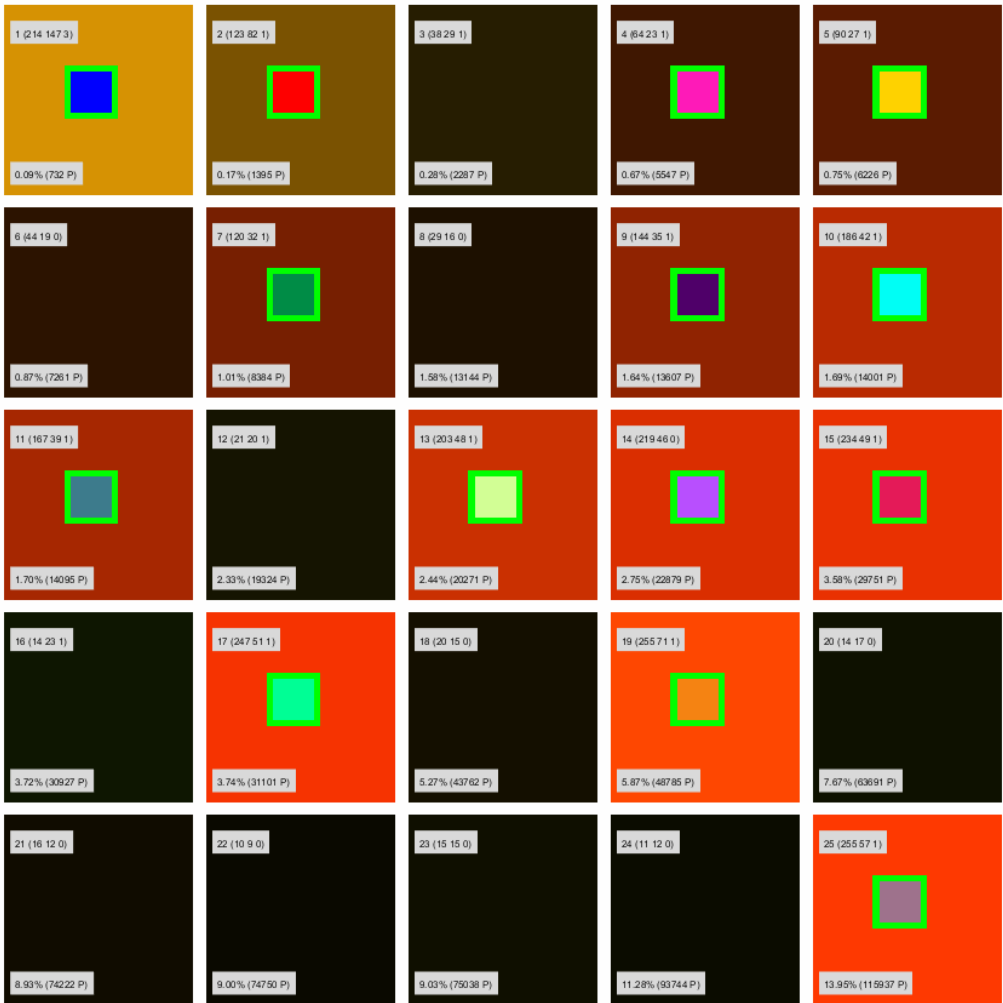

Figure S5. Example of barley image segmentation (VIS, side view).

Original image

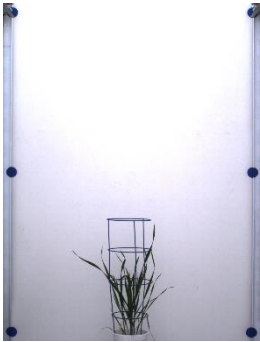

All 25 k-means color classes

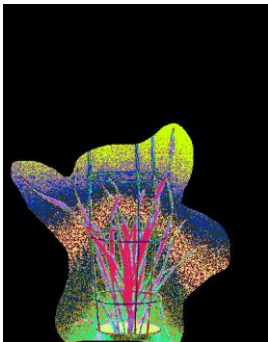

Binary image & convex hull

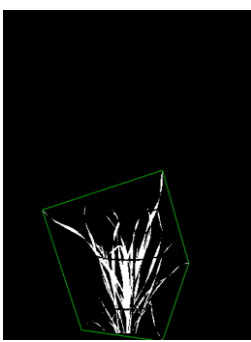

ROI after „clean outside“

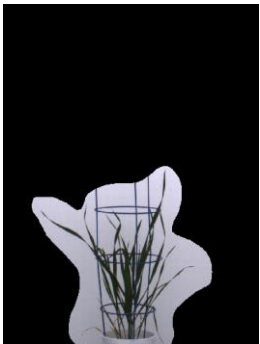

4 selected plant color classes

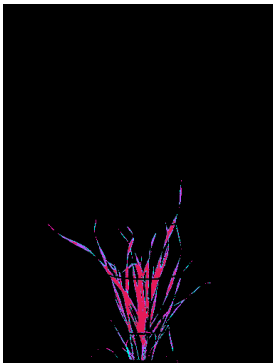

Segmented image

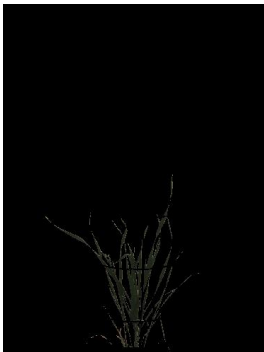

Overview of all and selected plant k-means color classes

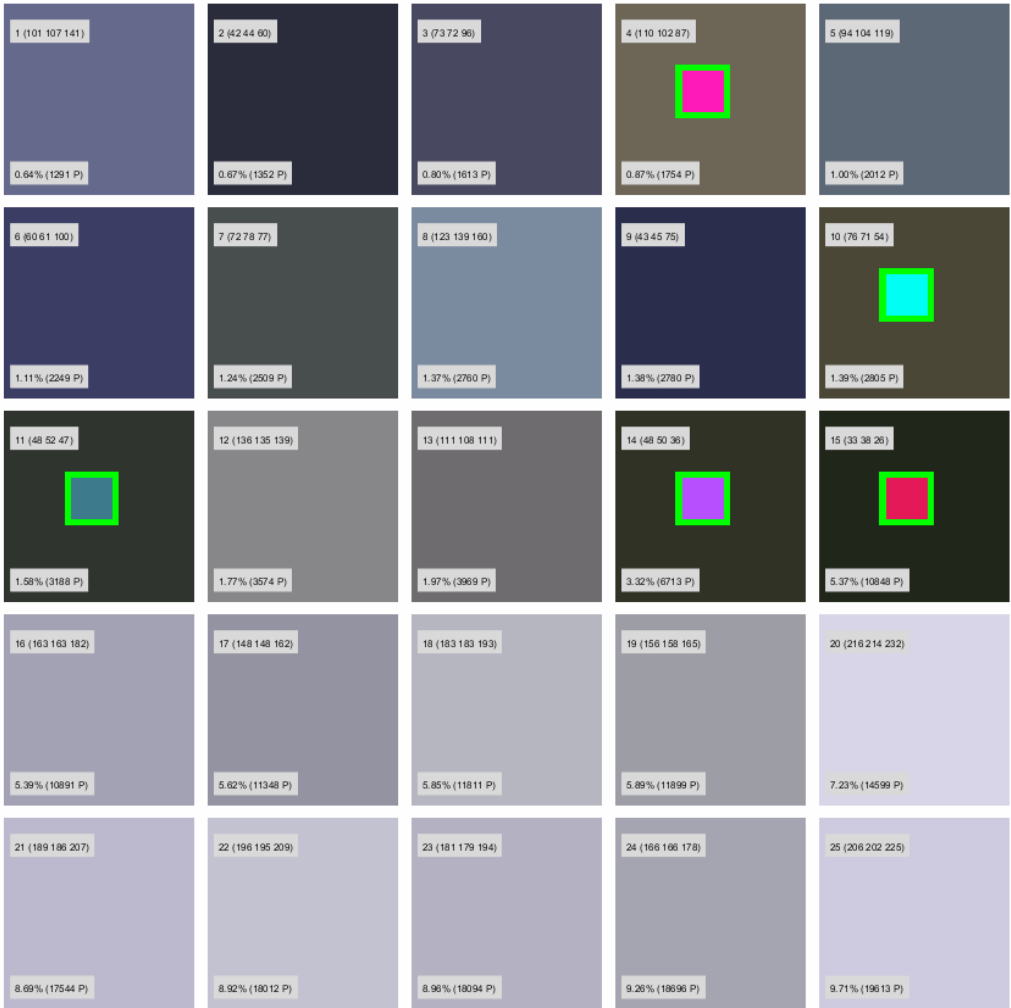



Figure S6. Example of barley image segmentation (VIS, top view).

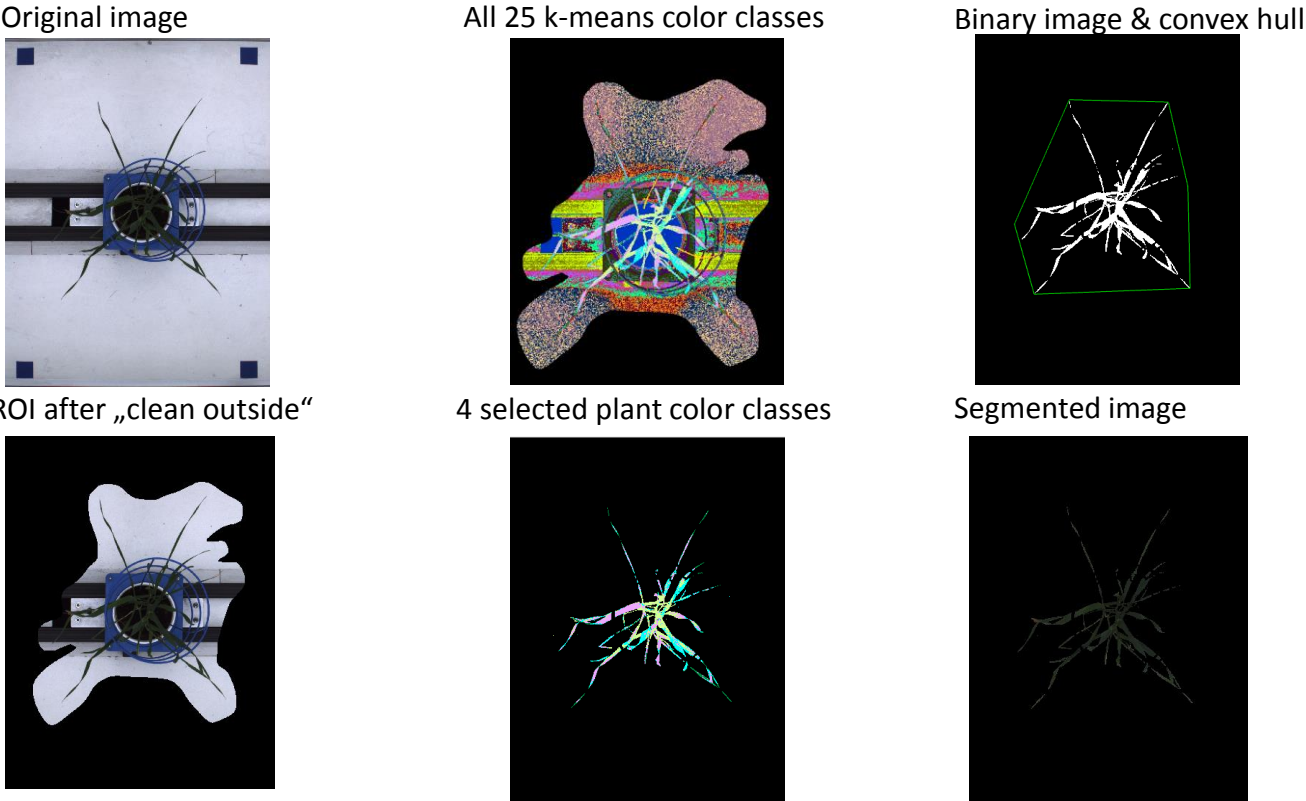

Overview of all and selected plant k-means color classes

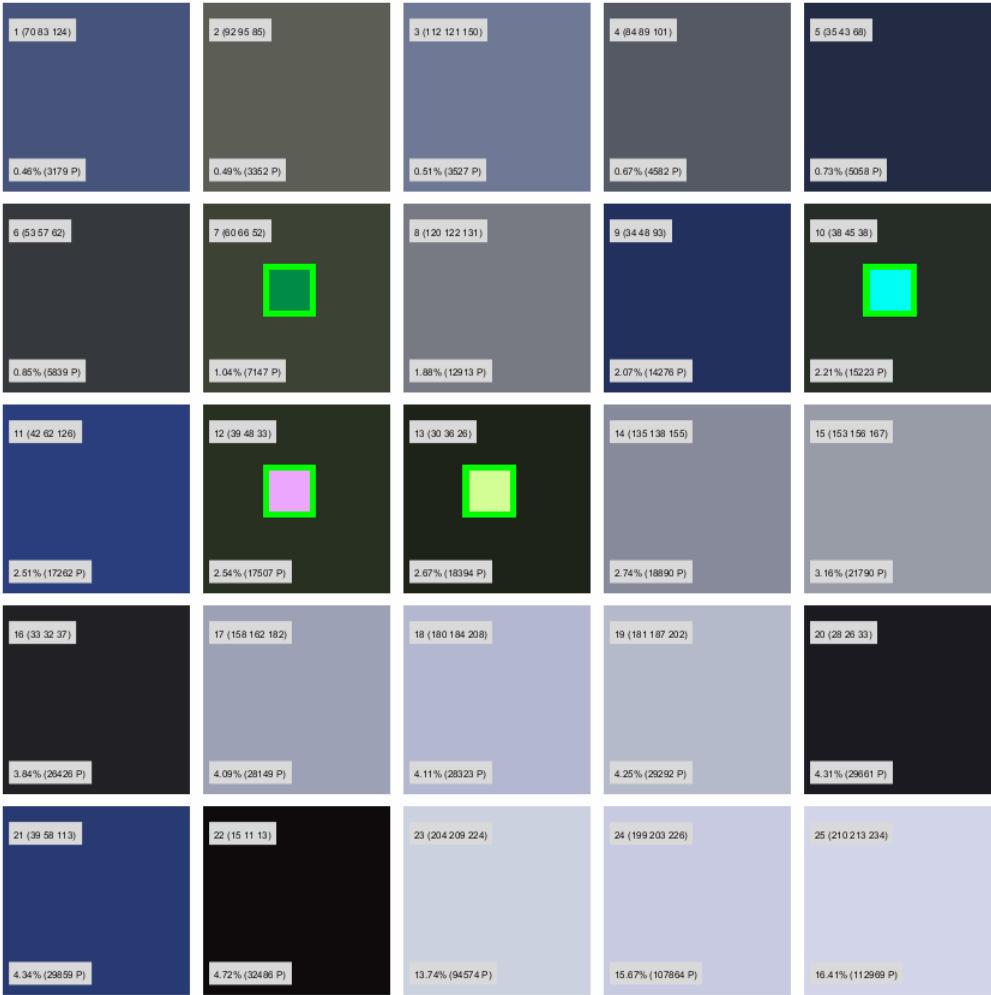

Figure S7. Example of barley image segmentation (FLUO, side view).

Original image

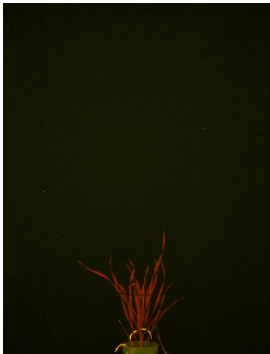

All 25 k-means color classes

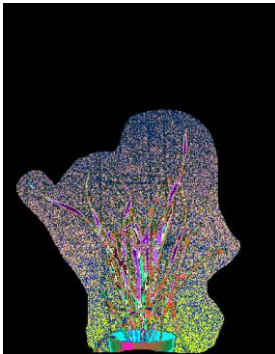

Binary image & convex hull

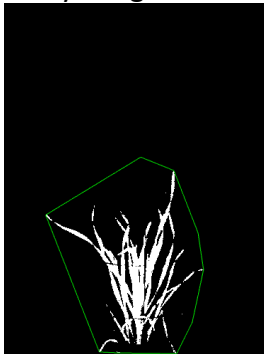

ROI after „clean outside“

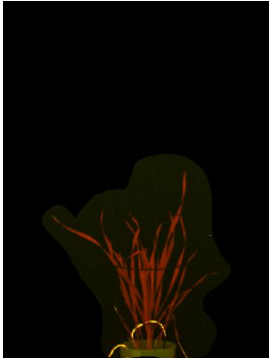

10 selected plant color classes

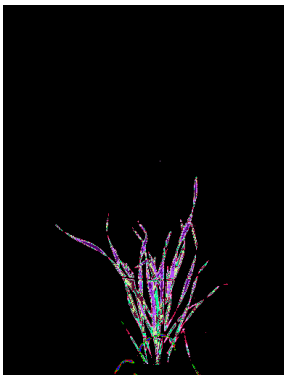

Segmented image

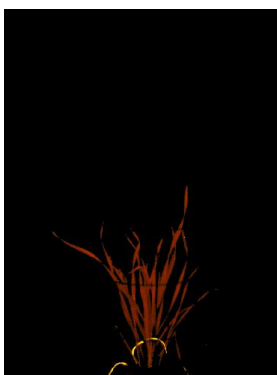

Overview of all and selected plant k-means color classes

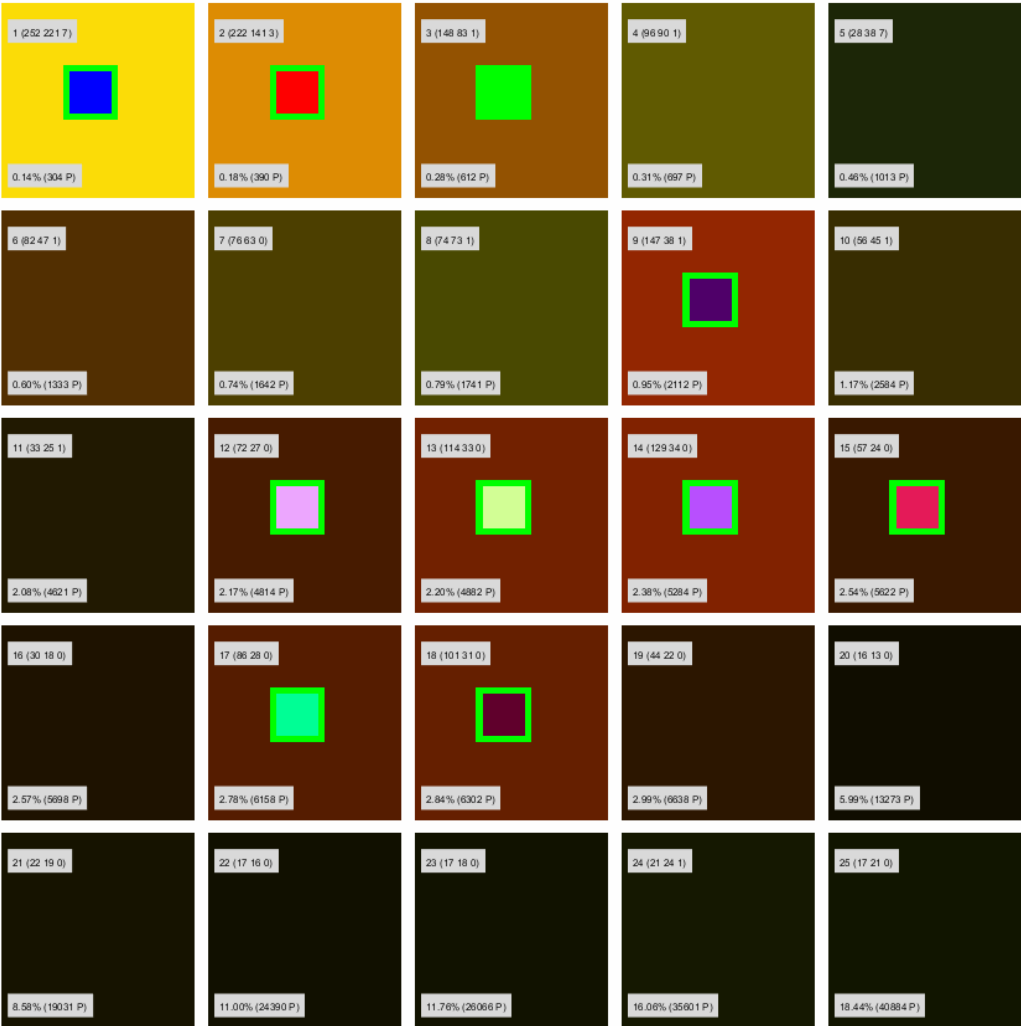

Figure S8. Example of barley image segmentation (FLUO, top view).

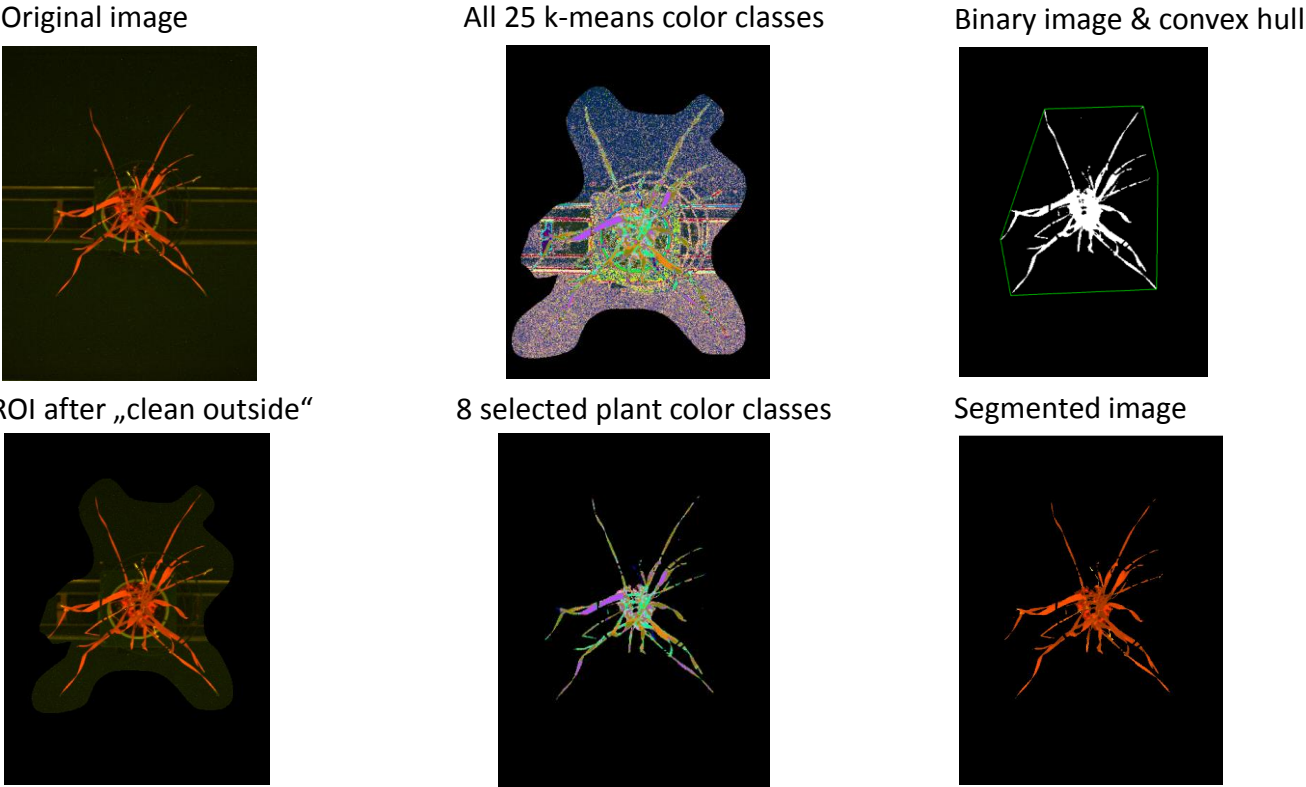

Overview of all and selected plant k-means color classes

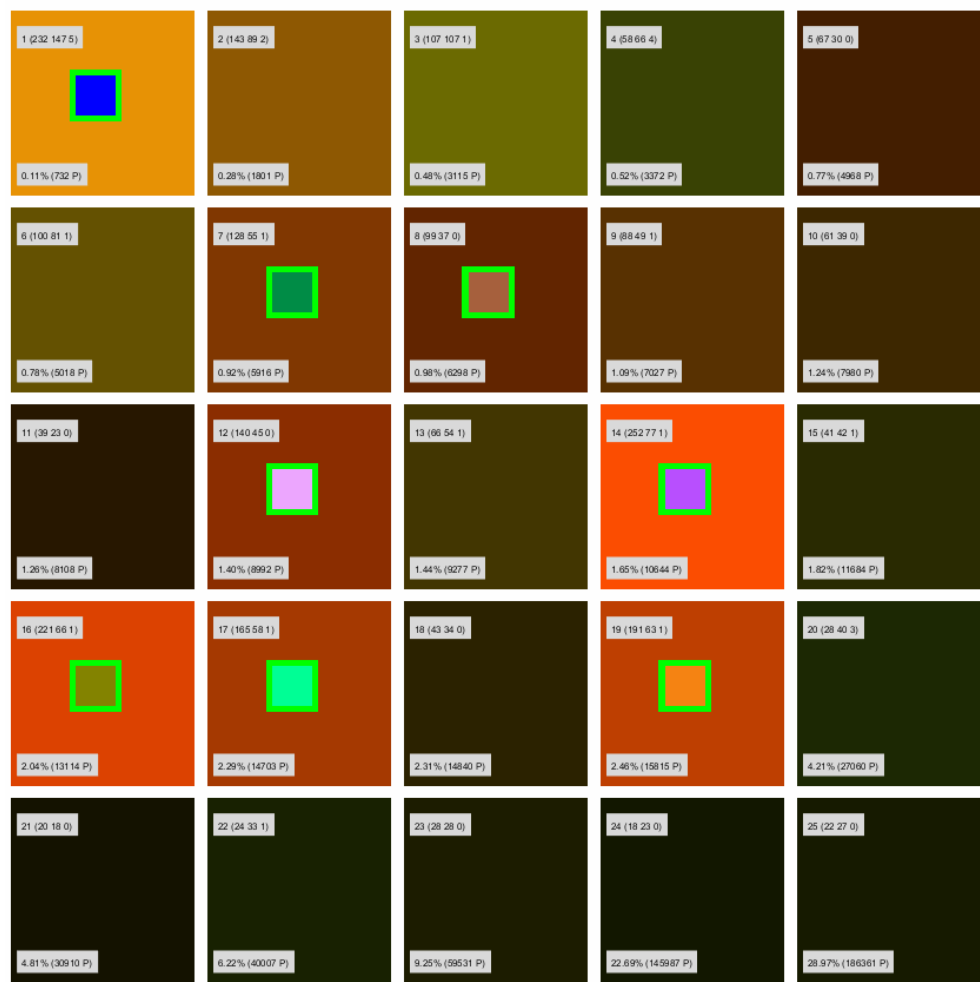

Figure S9. Example of maize image segmentation (VIS, side view).

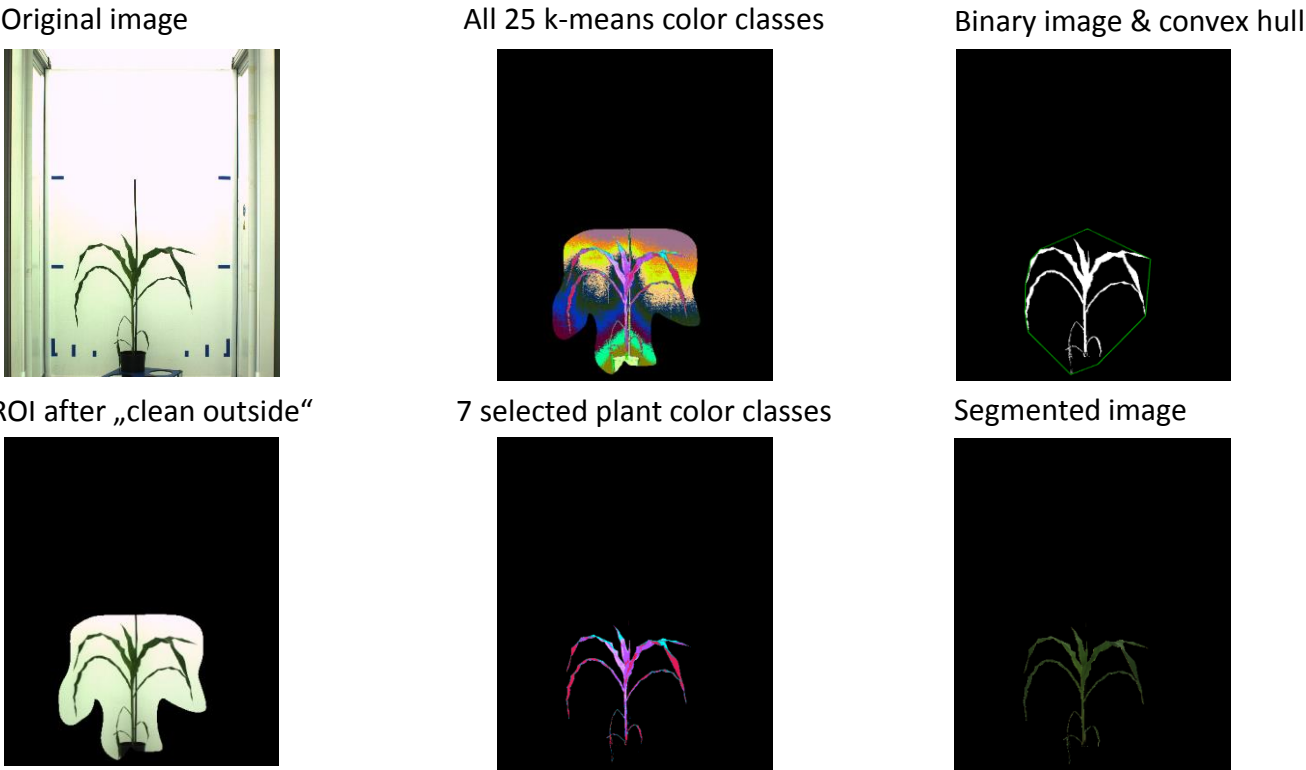

Overview of all and selected plant k-means color classes

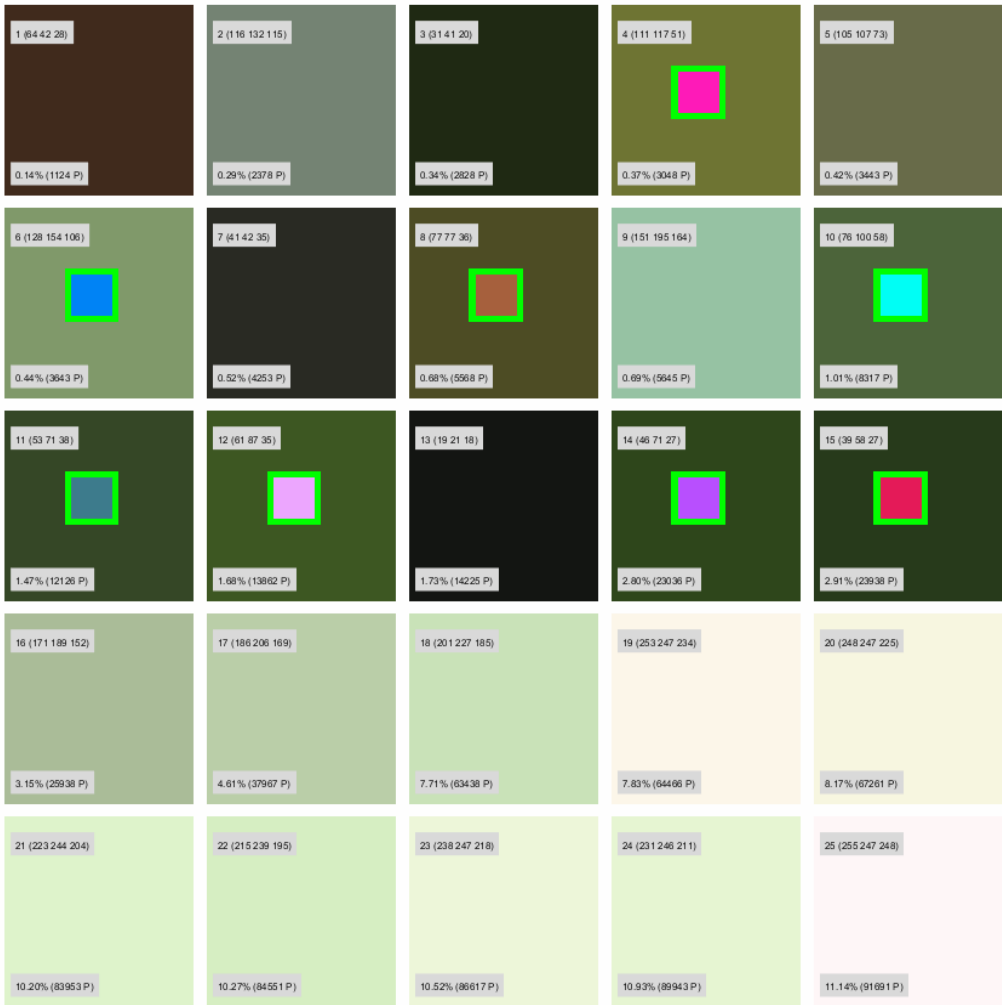

Figure S10. Example of maize image segmentation (VIS, top view).

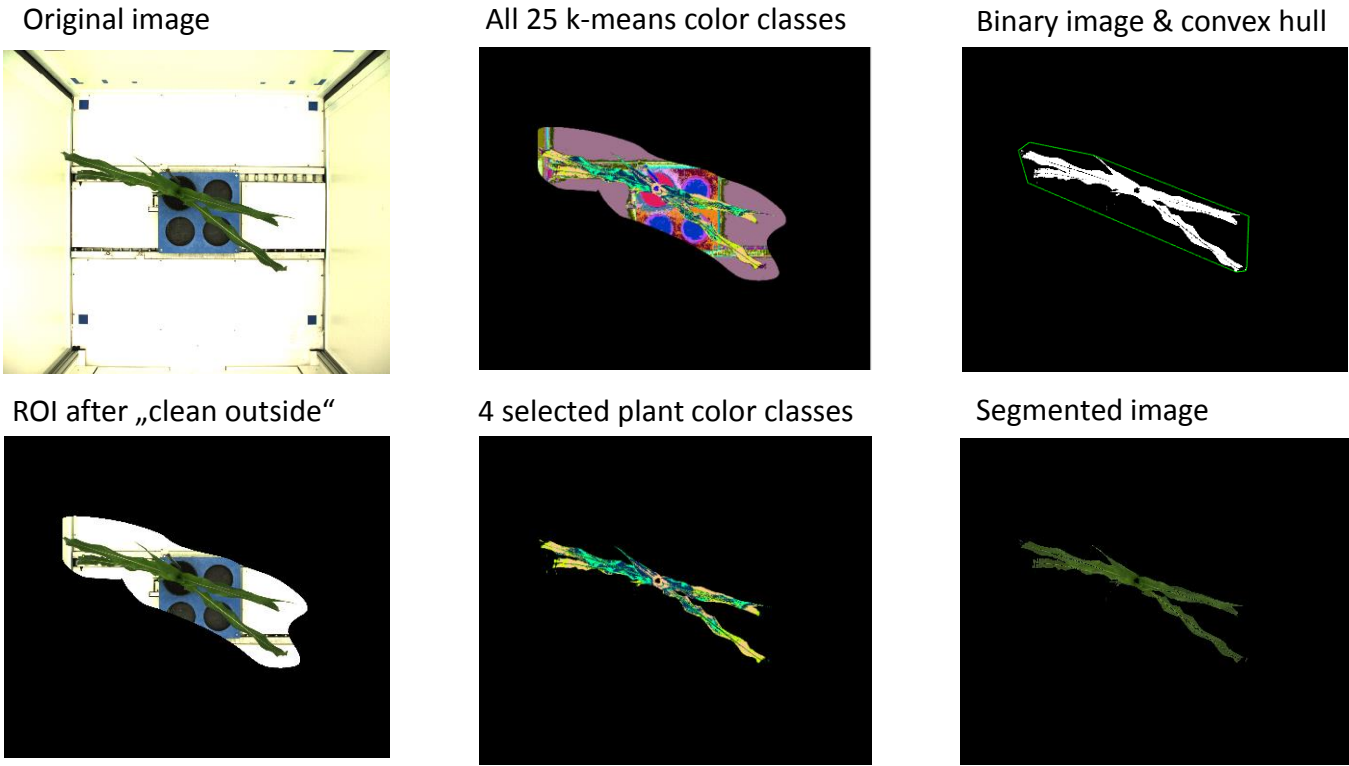

Overview of all and selected plant k-means color classes

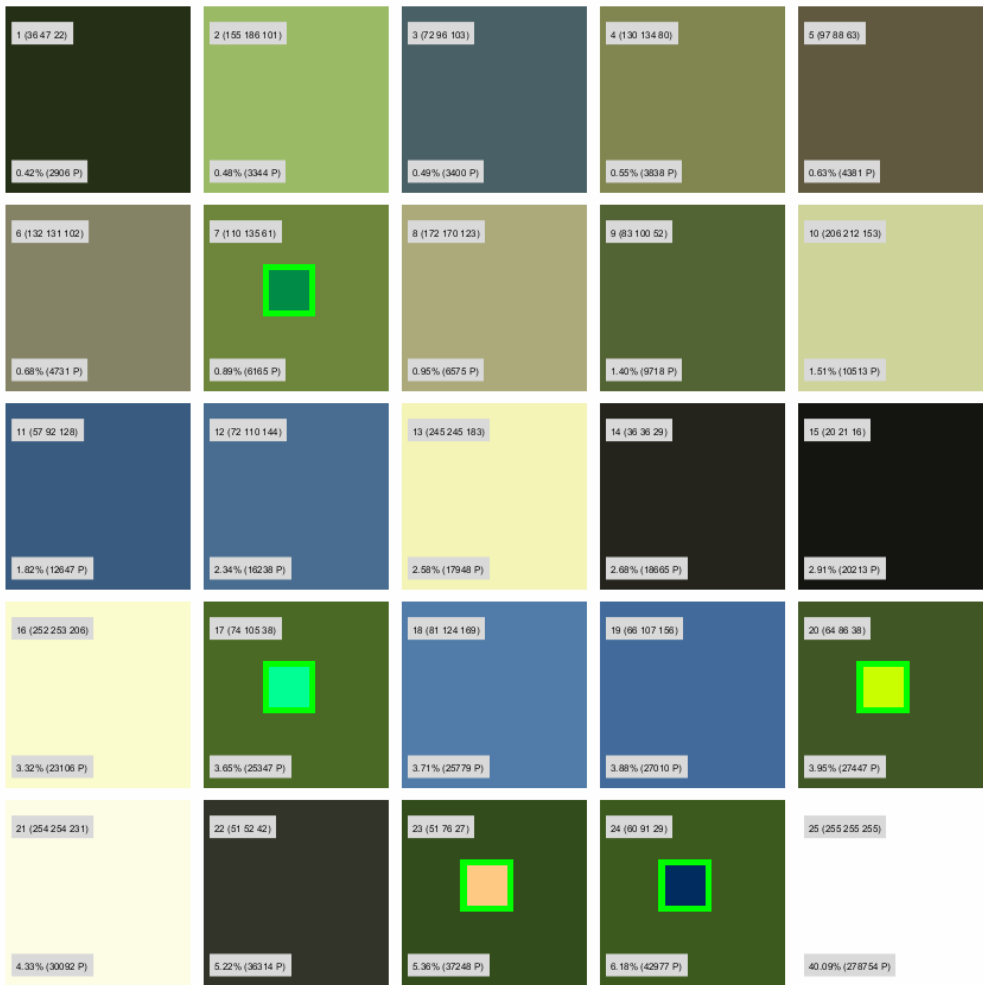

Figure S11. Example of maize image segmentation (FLUO, side view).

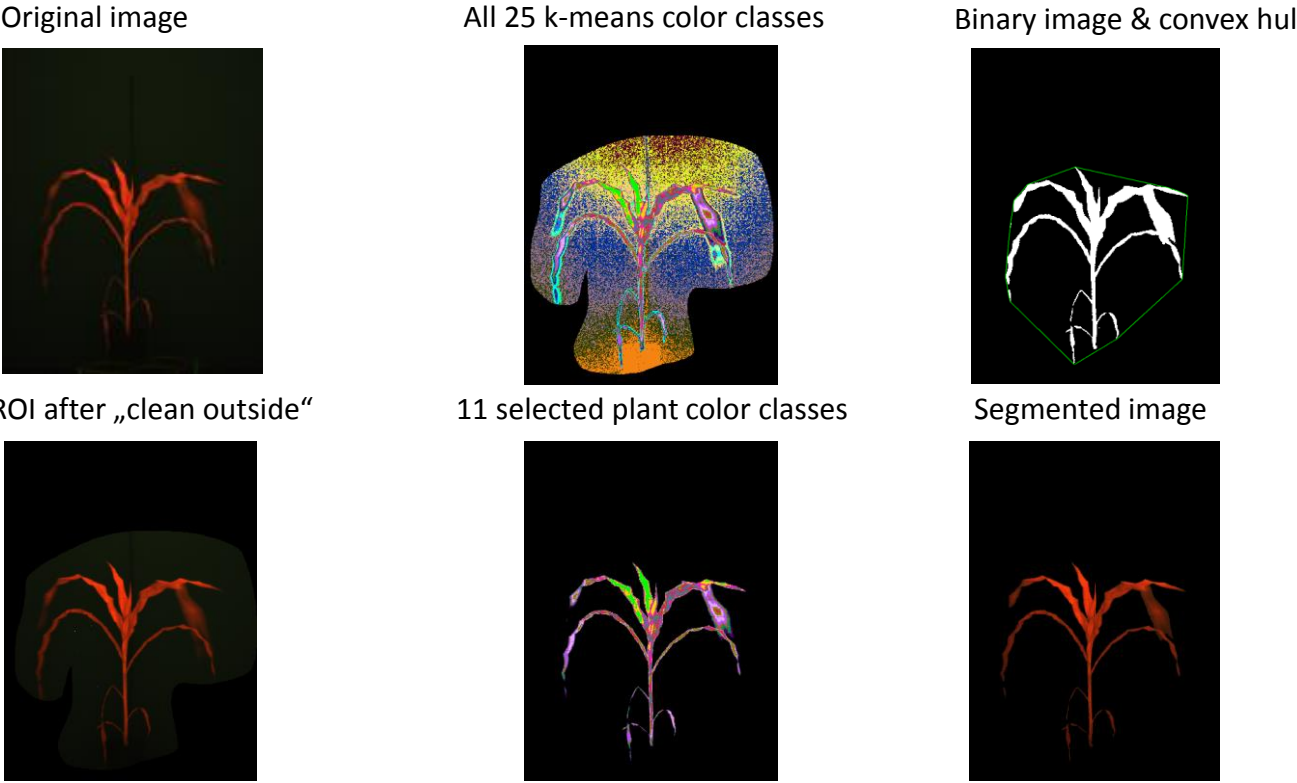

Overview of all and selected plant k-means color classes

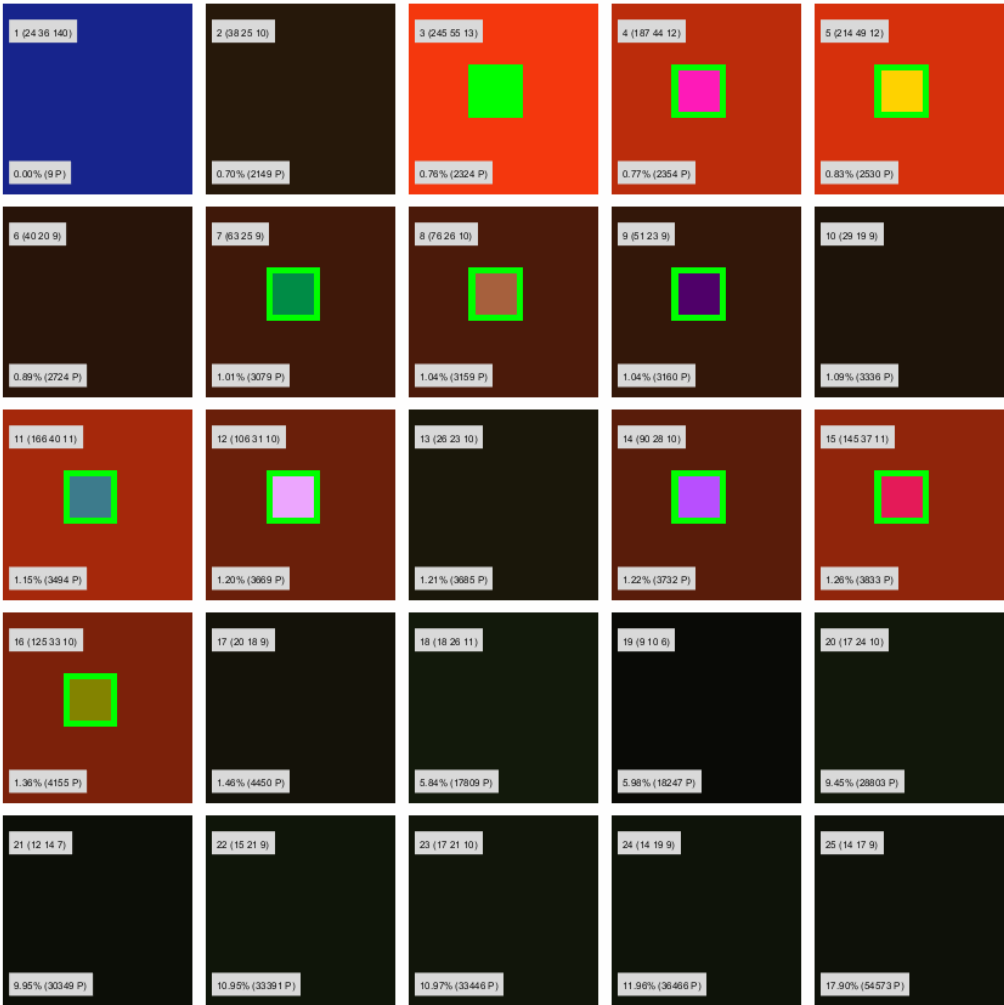

Figure S12. Example of maize image segmentation (FLUO, top view).

Original image

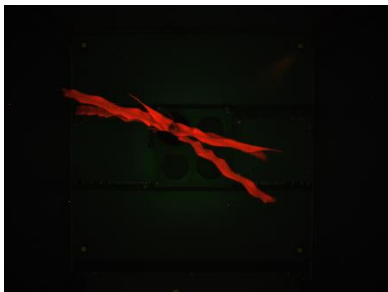

All 25 k-means color classes

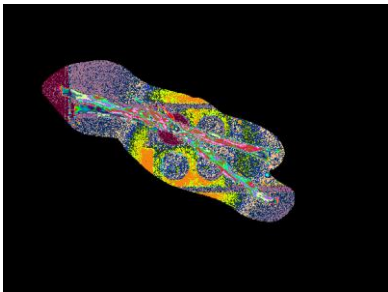

Binary image & convex hull

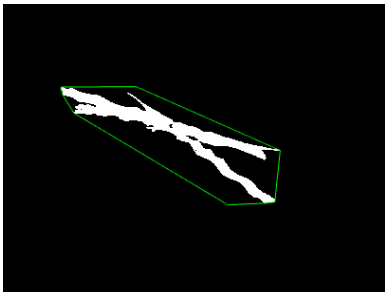

ROI after „clean outside“

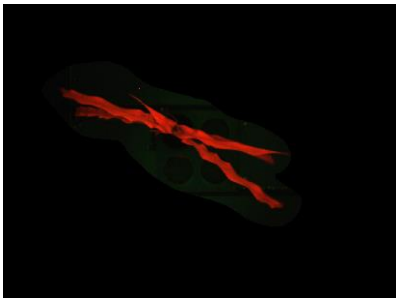

12 selected plant color classes

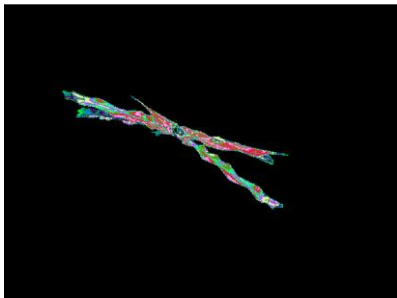

Segmented image

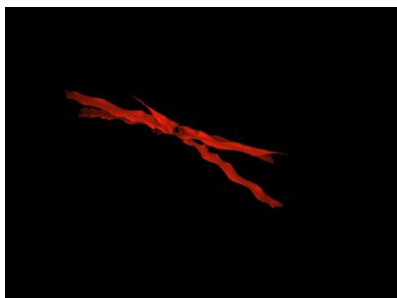

Overview of all and selected plant k-means color classes

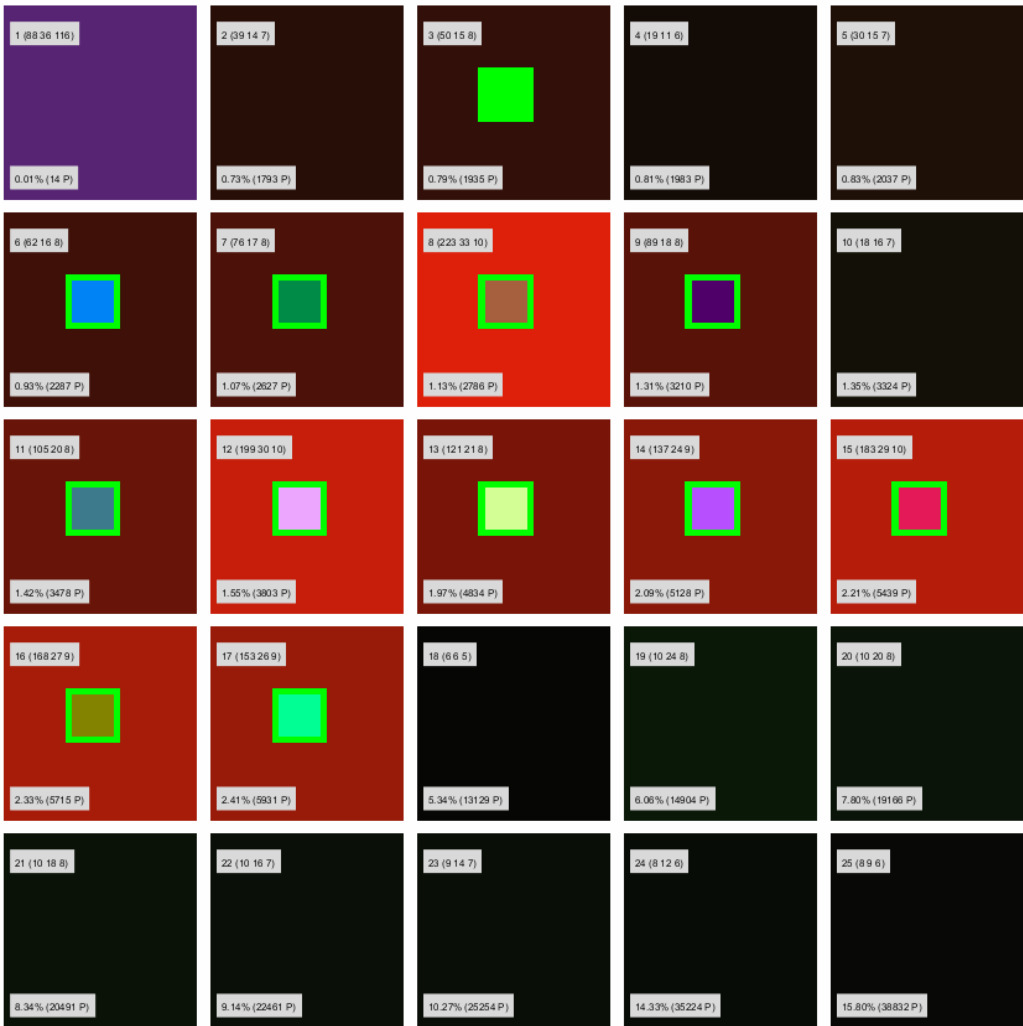

Figure S13. Example of segmentation of leaf speckles (RGB).

Original image

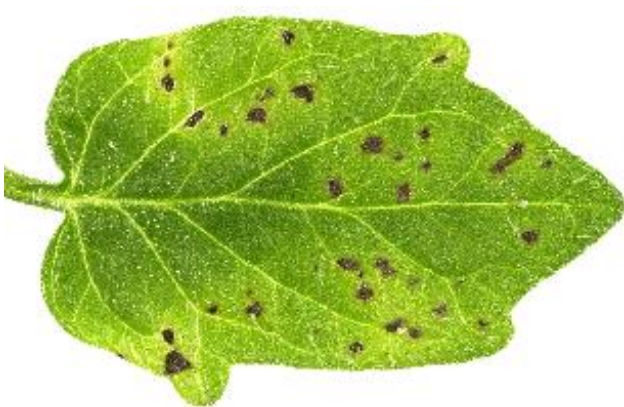

Segmented image

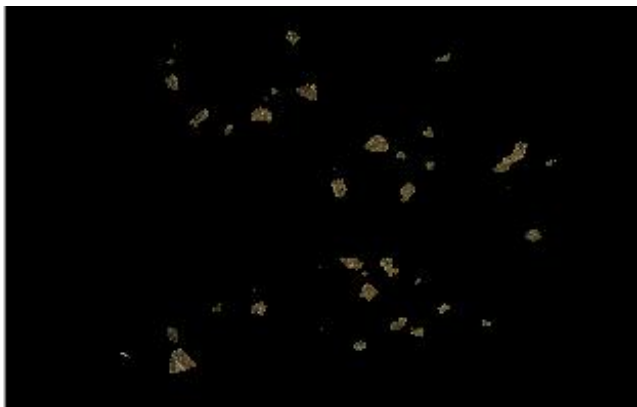

Overview of all and selected k-means color classes

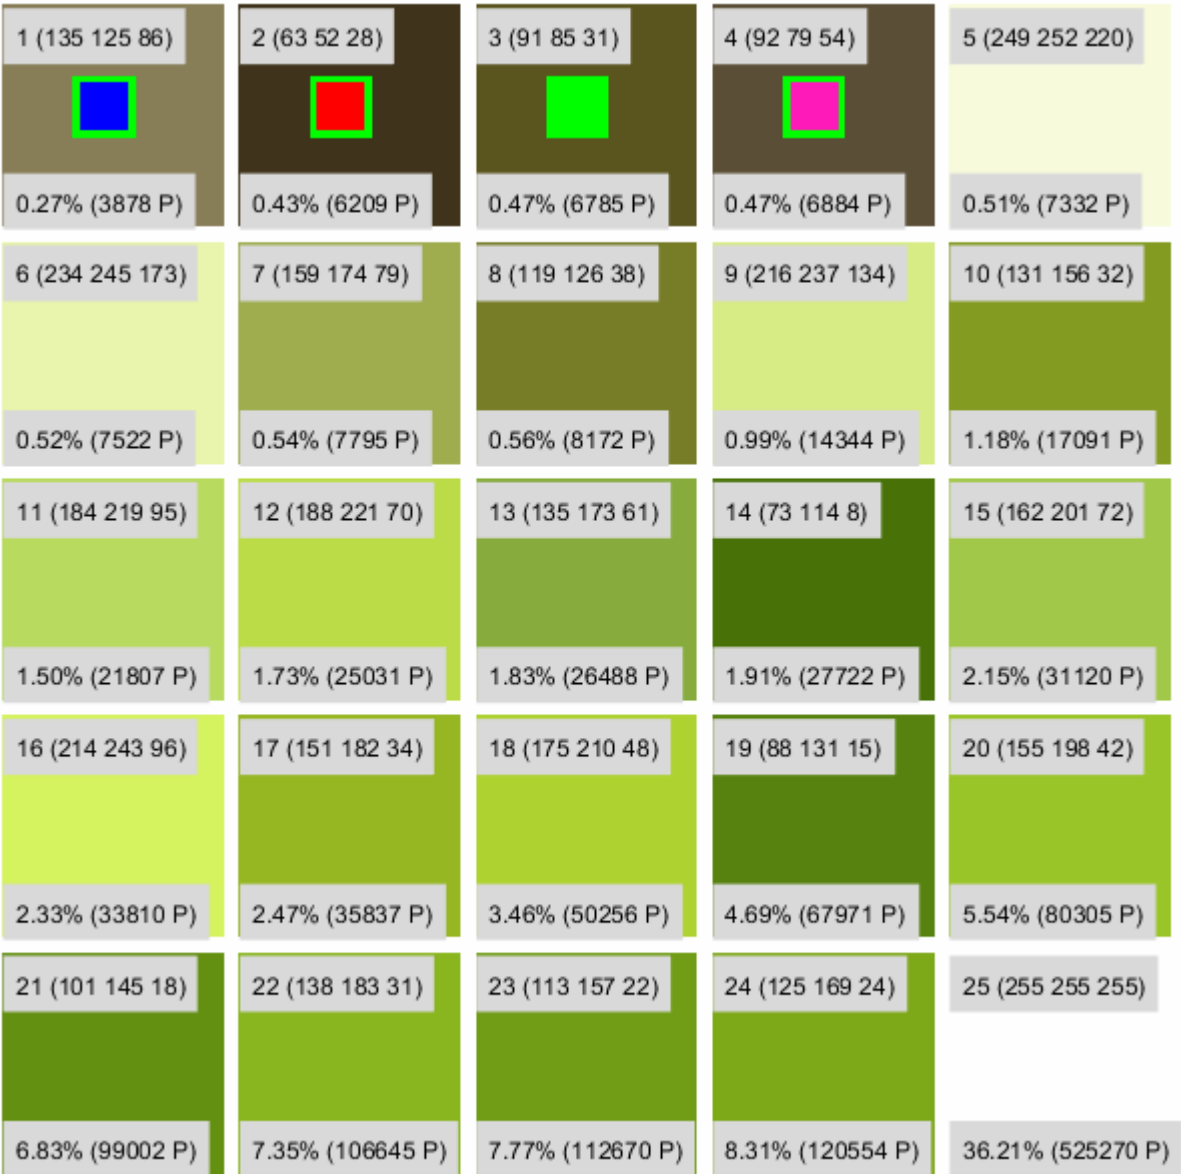



**Figure S14. Example of segmentation of leaf speckles (RGB).**

Original image

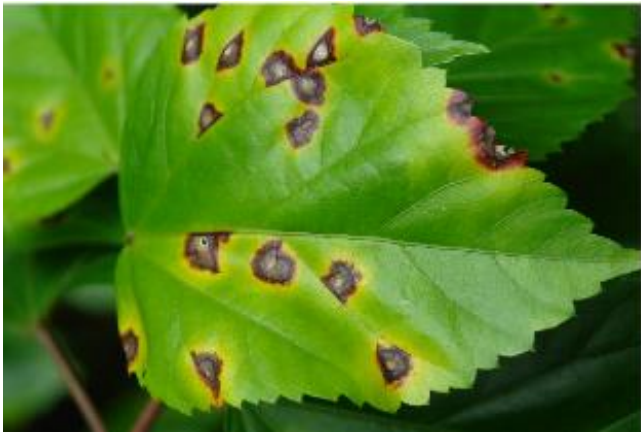

Segmented image

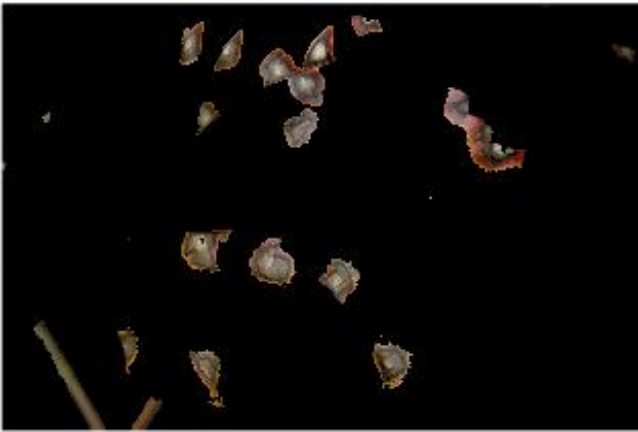

Overview of all and selected k-means color classes

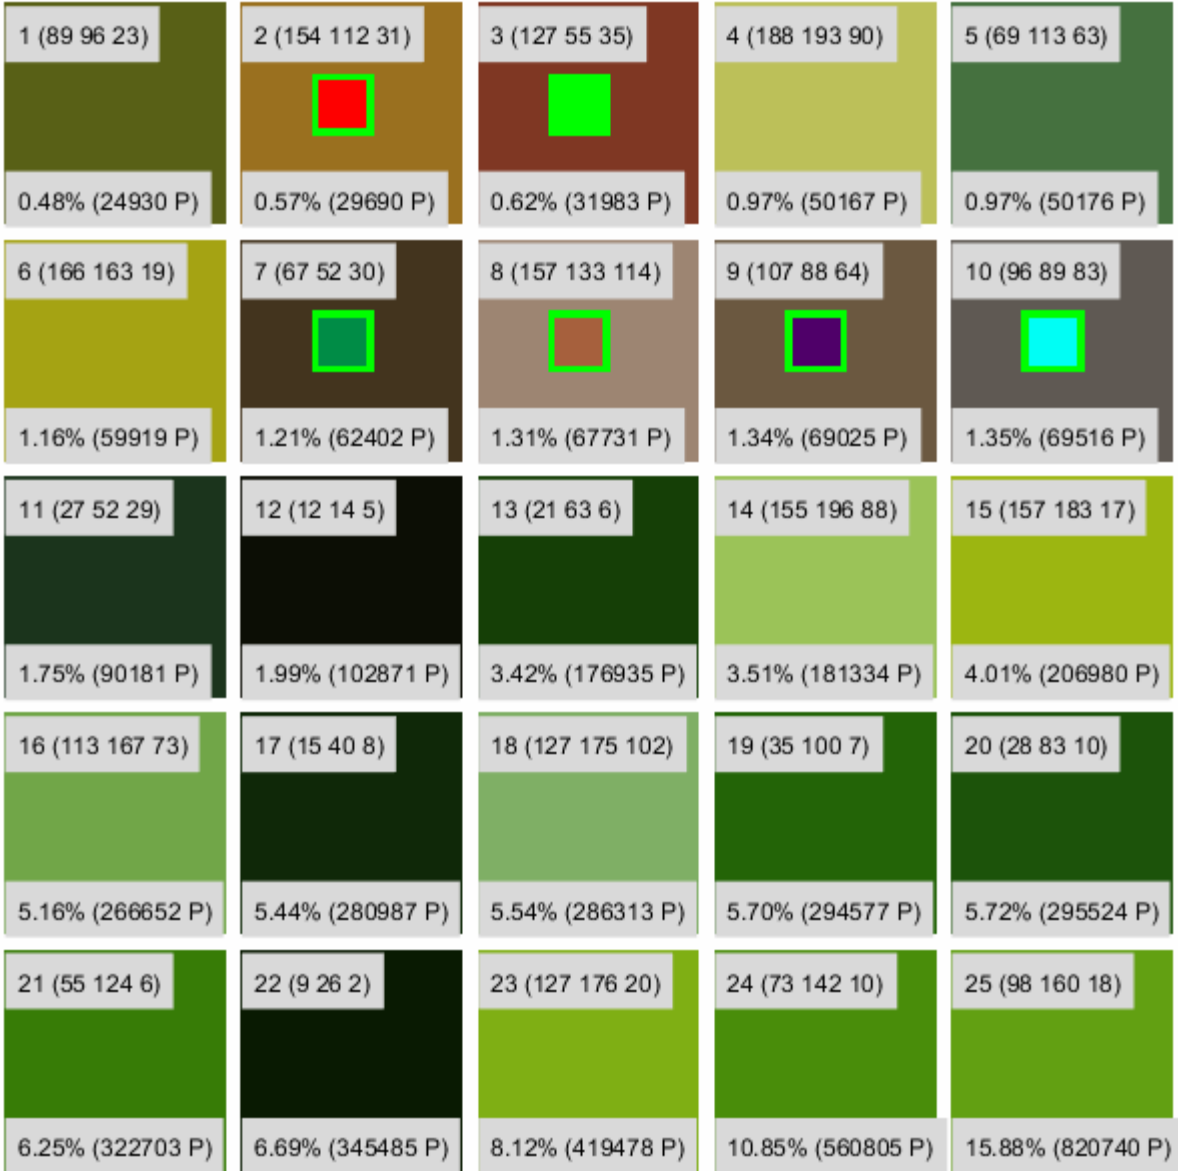

Figure S15. Example of segmentation of cherry tree image (RGB).

Original image

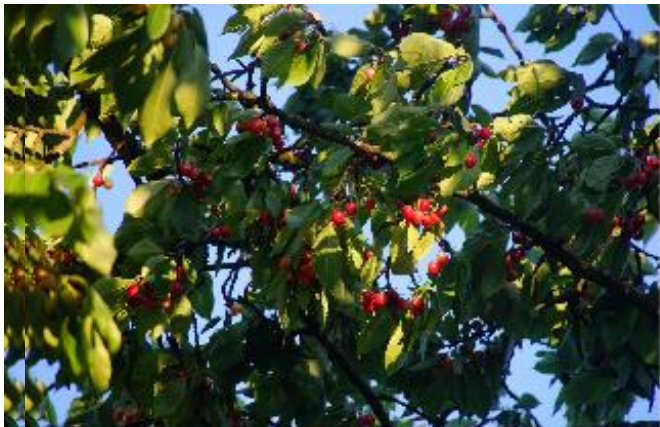

Segmented image

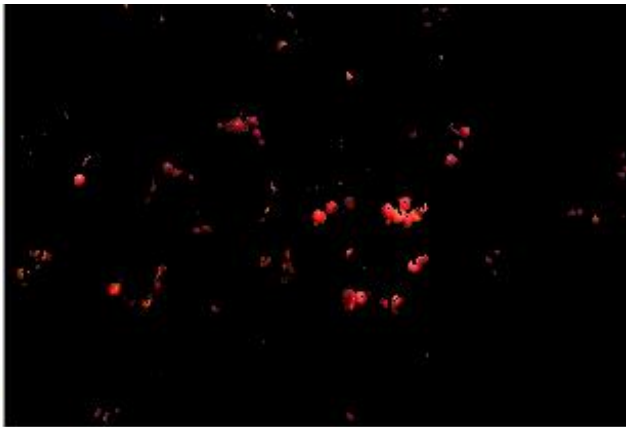

Overview of all and selected k-means color classes

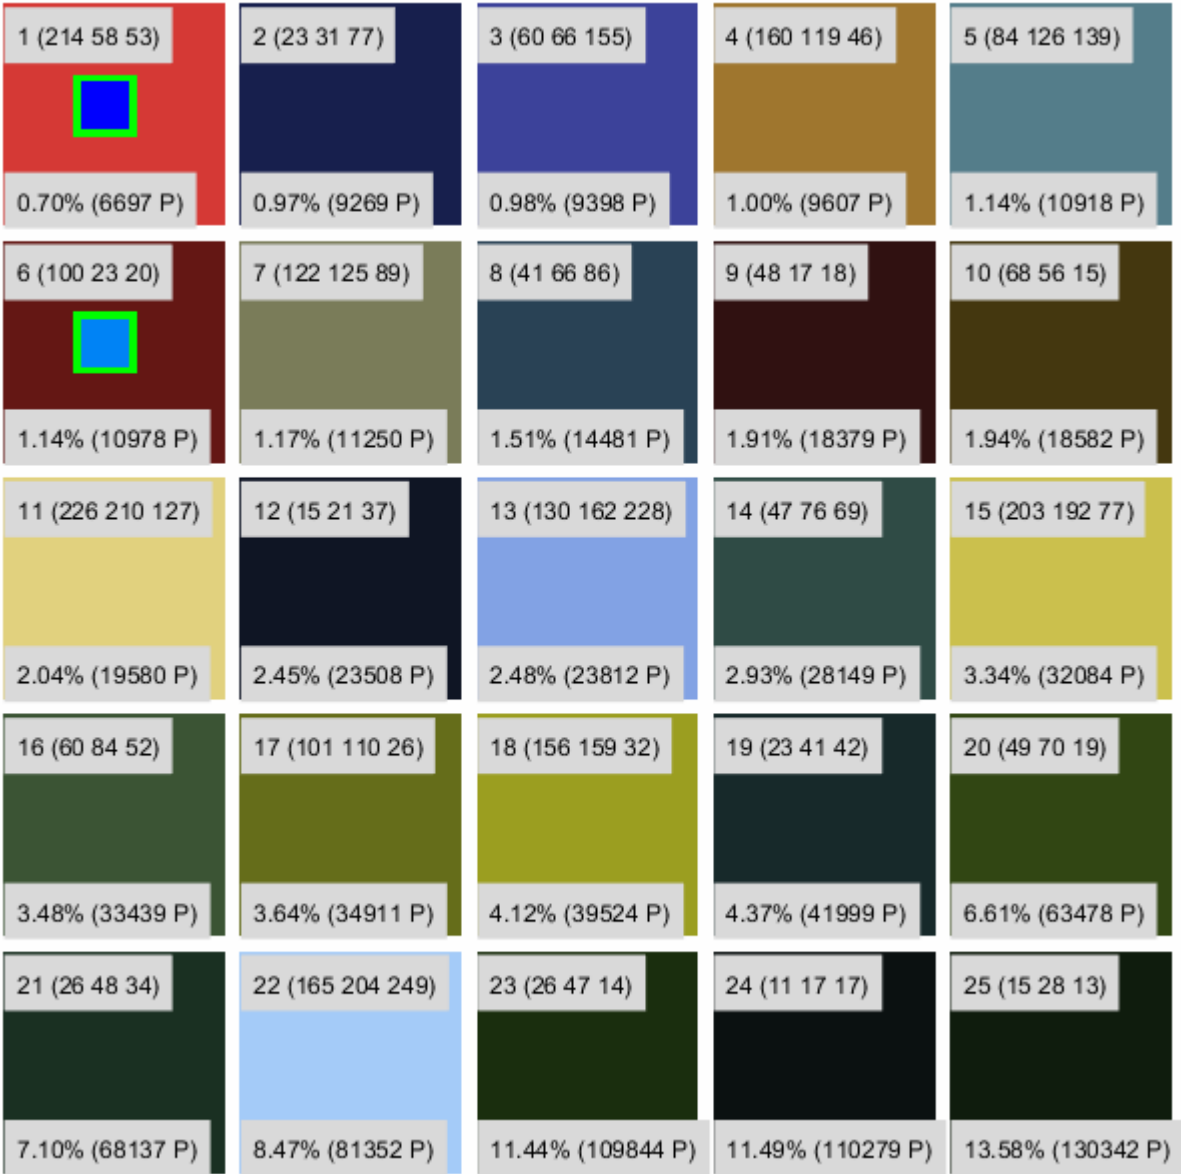

Figure S16. Example of segmentation of apple tree image (RGB).

Original image

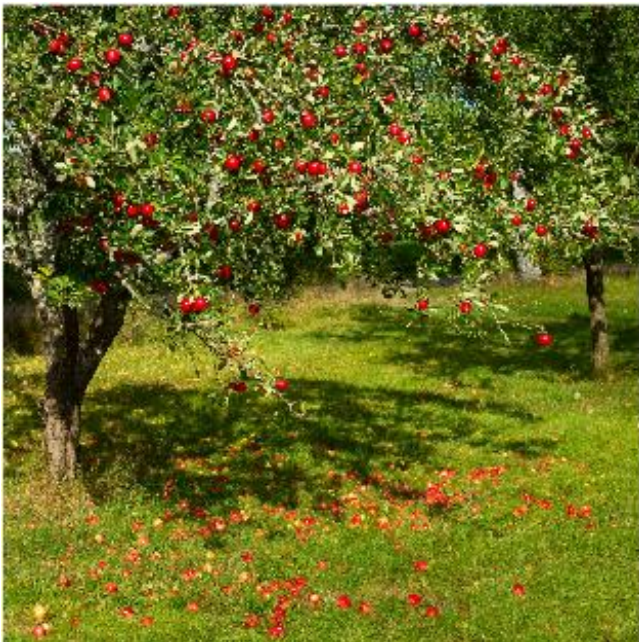

Segmented image

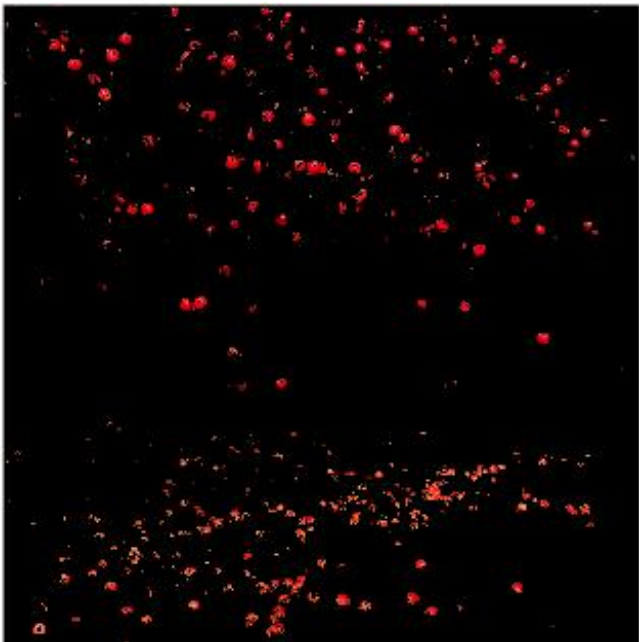

Overview of all and selected k-means color classes

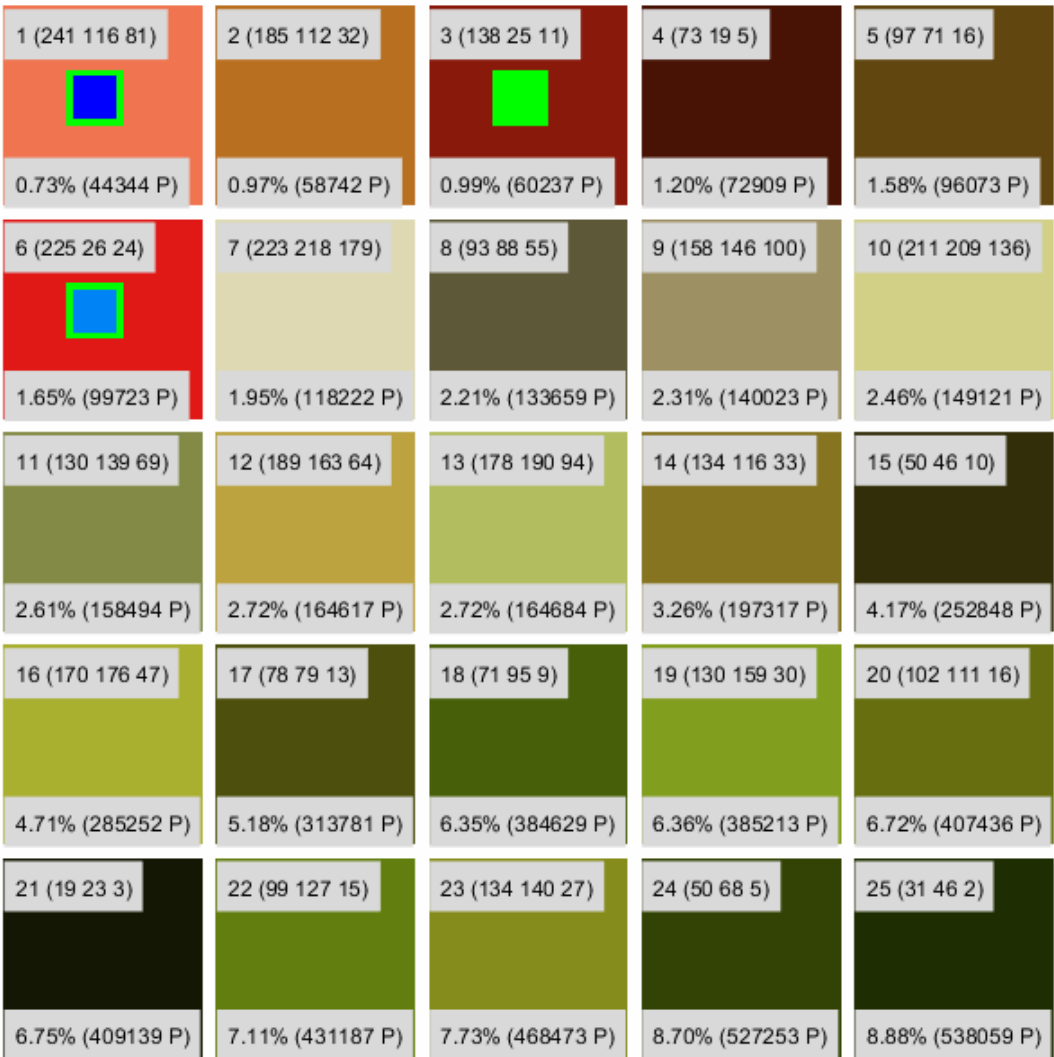

Figure S17. Example of segmentation of orange tree image (RGB).

Original image

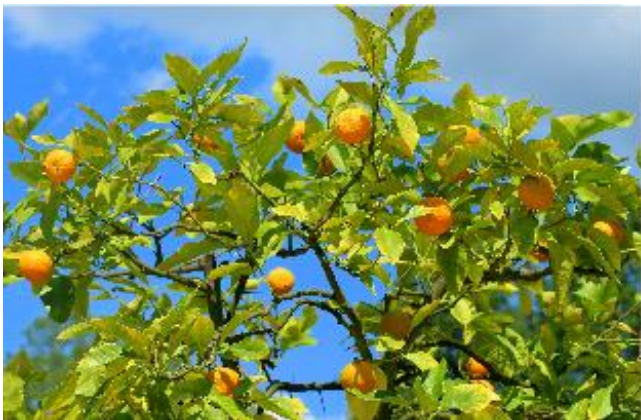

Segmented image

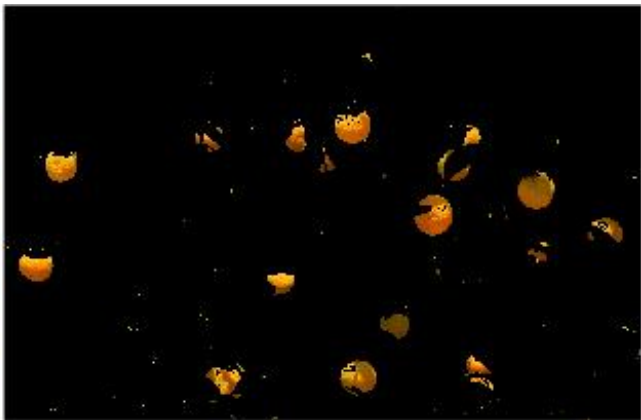

Overview of all and selected k-means color classes

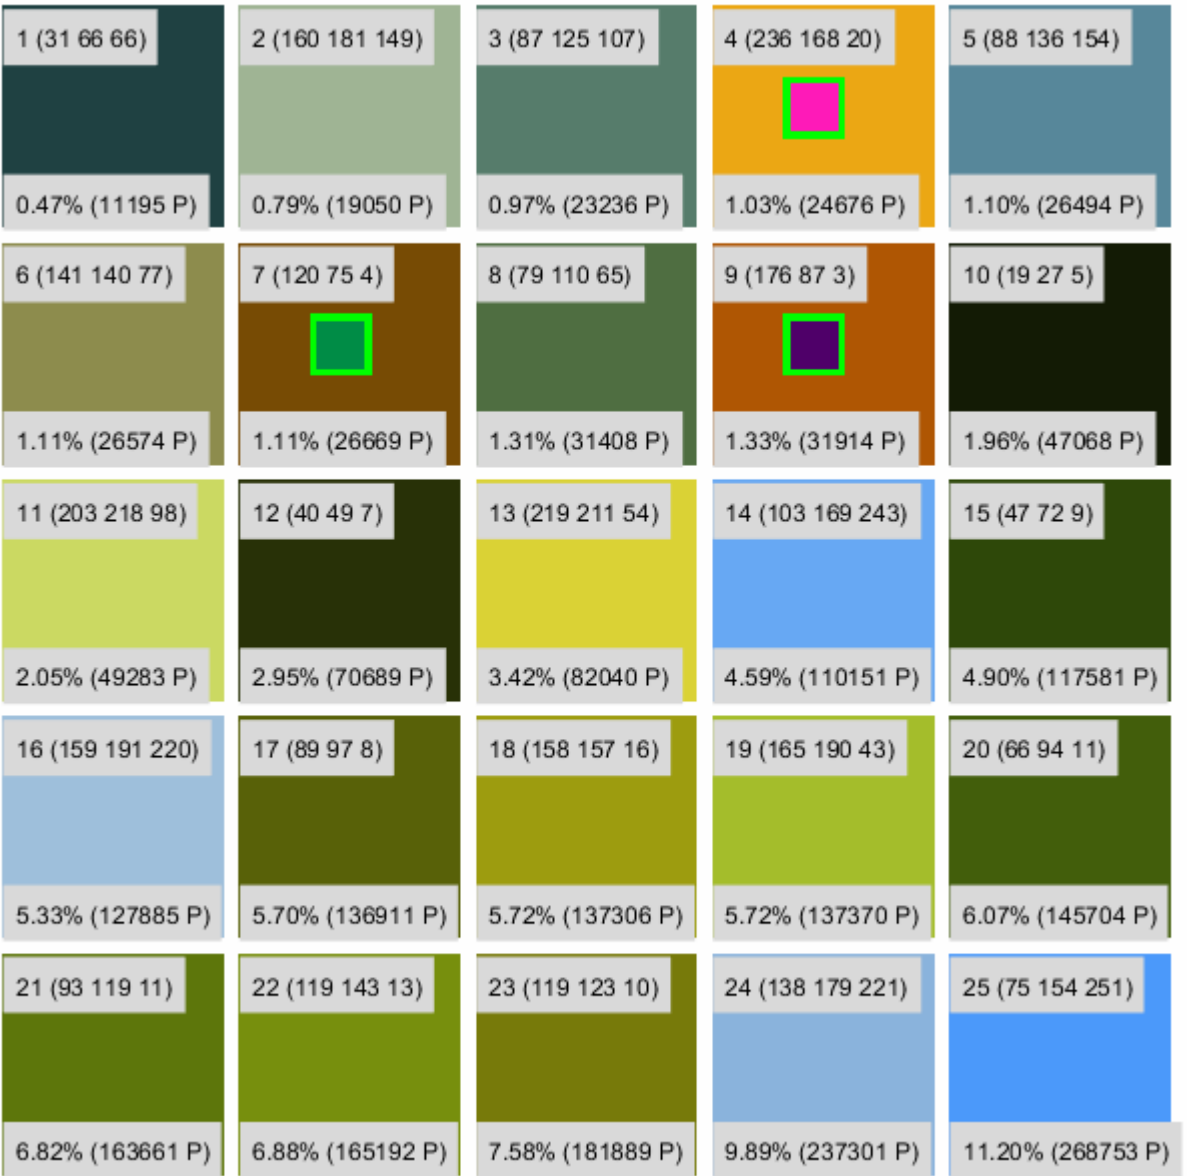



**Figure S18. Example of microscopic image segmentation (RGB of CLSM).**

Original image

Segmented green channel image

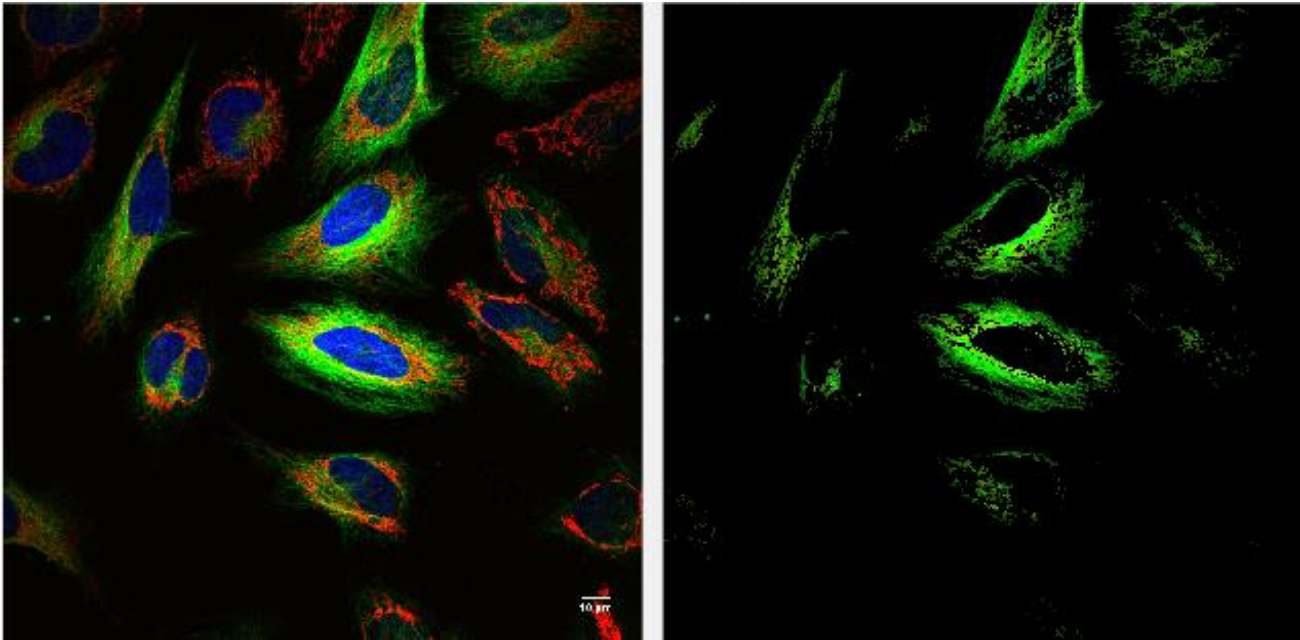

Overview of all and selected k-means color classes

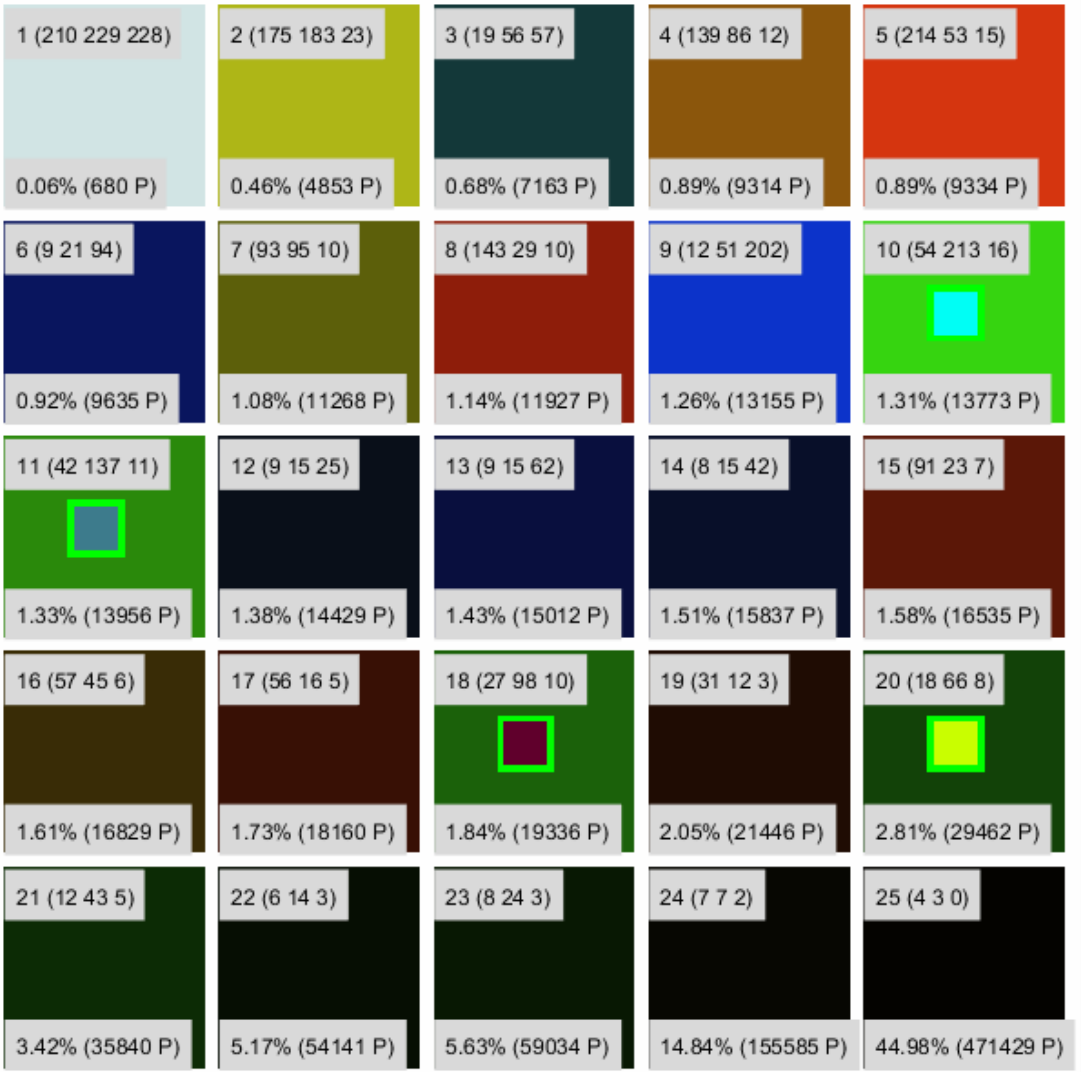

**Figure S19. Examples of ASCII (a) and MATLAB workspace (b) output files generated by the kmSeg tool for every segmented image.**

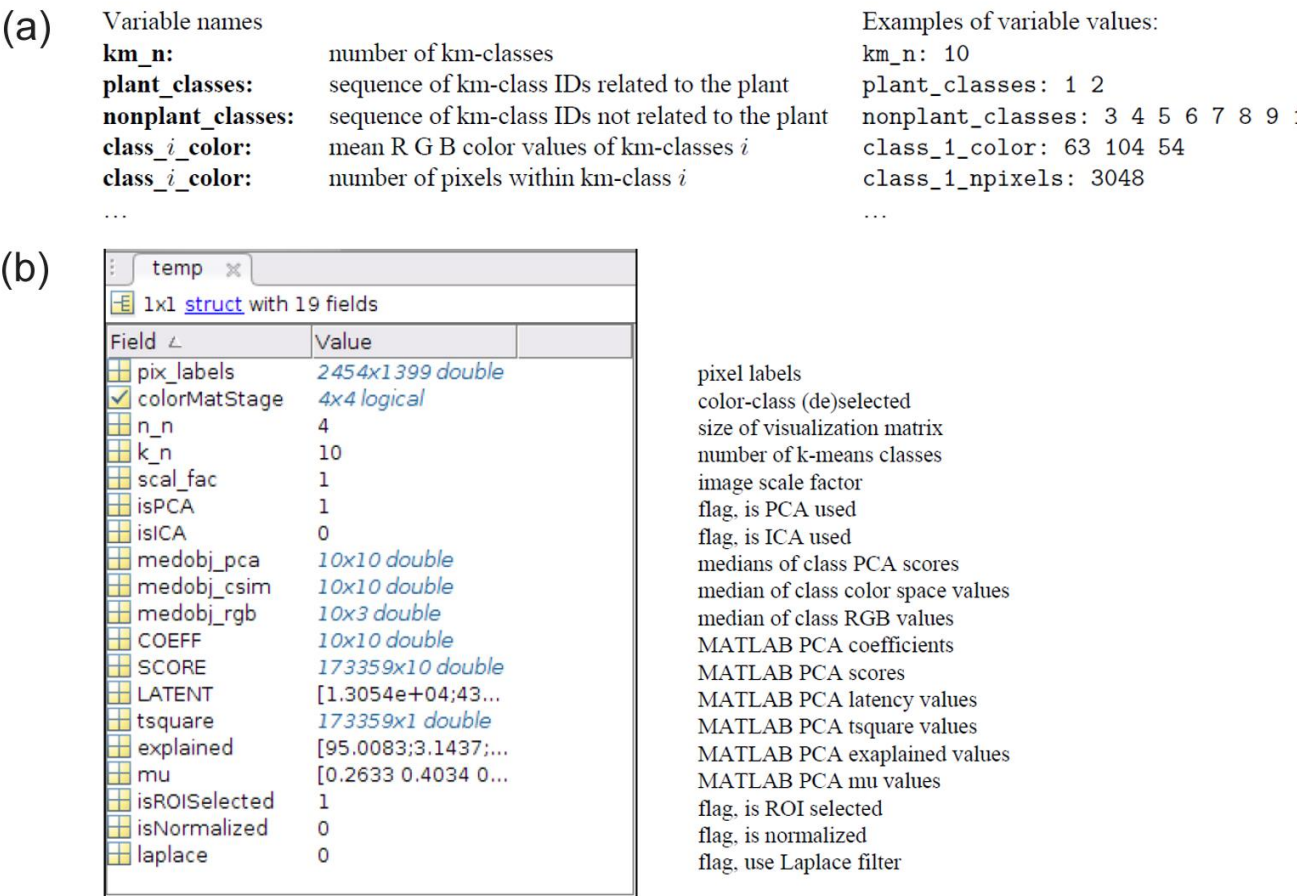

**Table S1. Overview of phenotypic traits automatically calculated using kmSeg.**

| Trait name             | Comments                                                                    |
|------------------------|-----------------------------------------------------------------------------|
| ImageName              | Full path and name of the analyzed image                                    |
| Shoot Area             | Number of segmented plant pixels                                            |
| BBX area               | Area of the bounding box of segmented image (in pixels <sup>2</sup> )       |
| Shoot Area to BBX Area | Ratio between the shoot area and bbx area                                   |
| BBX Height             | Height of segmented plant (in pixels)                                       |
| BBX Width              | Width of segmented plant (in pixels)                                        |
| Mean X                 | Mean coordinate of plant pixels projected onto the horizontal axis (X)      |
| Stdev X                | Stdev of coordinates of plant pixels projected onto the horizontal axis (X) |
| Mean Y                 | Mean coordinate of plant pixels projected onto the horizontal axis (Y)      |
| Stdev Y                | Stdev of coordinates of plant pixels projected onto the horizontal axis (Y) |
| CH Area                | Area of segmented convex hull (in pixels <sup>2</sup> )                     |
| CH Area to BBX Area    | Ratio between the area of the convex hull and bbx area                      |
| Shoot Area to CH Area  | Ratio between the plant area and area of convex hull                        |
| R mean                 | Mean red intensity of segmented plant                                       |
| R stdev                | Stdev of red intensity of segmented plant                                   |
| G mean                 | Mean green intensity of segmented plant                                     |
| G stdev                | Stdev of green intensity of segmented plant                                 |
| B mean                 | Mean blue intensity of segmented plant                                      |
| B stdev                | Stdev of blue intensity of segmented plant                                  |
| H mean                 | Mean H color intensity (HSV space)                                          |
| H stdev                | Stdev of H color intensity (HSV space)                                      |
| S mean                 | Mean S color intensity (HSV space)                                          |
| S stdev                | Stdev of S color intensity (HSV space)                                      |
| V mean                 | Mean V color intensity (HSV space)                                          |
| V stdev                | Stdev of V color intensity (HSV space)                                      |
| L mean                 | Mean L color intensity (Lab space)                                          |
| L stdev                | Stdev of L color intensity (Lab space)                                      |
| a mean                 | Mean a color intensity (Lab space)                                          |
| a stdev                | Stdev of a color intensity (Lab space)                                      |
| b mean                 | Mean b color intensity (Lab space)                                          |
| b stdev                | Stdev of b color intensity (Lab space)                                      |
| hsy_H mean             | Mean H color intensity (HNY space)                                          |
| hsy_H stdev            | Stdev of H color intensity (HNY space)                                      |
| hsy_S mean             | Mean N color intensity (HNY space)                                          |
| hsy_S stdev            | Stdev of N color intensity (HNY space)                                      |
| hsy_Y mean             | Mean Y color intensity (HNY space)                                          |
| hsy_Y stdev            | Stdev of Y color intensity (HNY space)                                      |
